# Supplementary material for: Influence of sequence variation on the RNA cleavage activity of Zn2+-dimethyl-dppz-PNA-based artificial enzymes
Source: RSC Adv. 2022 Feb 14;12(9):5398–406. doi: 10.1039/d1ra08319h (PMC8981518; doi:10.1039/d1ra08319h)
Supplement: RA-012-D1RA08319H-s001 [file RA-012-D1RA08319H-s001.pdf]

## Influence of sequence variation on the RNA cleavage activity of Zn<sup>2+</sup>-dimethyl-dppz-PNA-based artificial enzymes

Olivia Luige,<sup>a</sup> Kristina Karalé,<sup>ab</sup> Partha Pratim Bose,<sup>a</sup> Martin Bollmark,<sup>b</sup> Ulf Tedebark,<sup>b</sup> Merita Murtola <sup>a</sup> and Roger Strömberg <sup>\*a</sup>

<sup>a</sup> Department of Biosciences and Nutrition, Karolinska Institutet, Neo, 141 83 Huddinge, Sweden.

<sup>b</sup> RISE Chemical Process and Pharmaceutical Development, Forskargatan 18, 15136 Södertälje, Sweden

### Electronic Supplementary Information

|            |                                                                                                                |    |
|------------|----------------------------------------------------------------------------------------------------------------|----|
| S-1.       | Purity analysis of PNA conjugates .....                                                                        | 2  |
| S-2.       | RNA cleavage experiments .....                                                                                 | 8  |
| S-3.       | Analysis of RNA Cleavage by IEX-HPLC and ESI-TOF MS .....                                                      | 9  |
| S-3.1      | The extent of cleavage of AAA bulges in RNAs 2-5 by the corresponding <i>PNAzymes II-V</i> .....               | 9  |
| S-3.2      | MS analysis of RNA fragments from the cleavage of RNAs 2-4 by <i>PNAzymes II-IV</i> .....                      | 10 |
| S-3.3      | The extent of cleavage of 3-nucleotide bulge-forming RNAs 6-9 by <i>PNAzyme IV</i> .....                       | 12 |
| S-3.4      | The extent of cleavage of 3-nucleotide bulge-forming RNAs 10-12 by <i>PNAzyme V</i> .....                      | 14 |
| S-3.5      | MS analysis of RNA fragments from the cleavage of RNA 11 by <i>PNAzyme V</i> .....                             | 15 |
| S-3.6      | The extent of cleavage of 2-nucleotide bulge-forming RNAs 13-15 by <i>PNAzyme IV</i> .....                     | 15 |
| S-3.7      | MS analysis of RNA fragments from the cleavage of RNAs 13, 15 by <i>PNAzyme IV</i> .....                       | 16 |
| S-3.8      | The extent of cleavage of 2-nucleotide bulge-forming RNAs 16-17 by <i>PNAzyme V</i> .....                      | 18 |
| S-3.9      | MS analysis of RNA fragments from the cleavage of RNA 17 by <i>PNAzyme V</i> .....                             | 18 |
| S-3.10     | The extent of cleavage of UA bulges in RNAs 18-19 by <i>PNAzymes II-III</i> .....                              | 20 |
| S-3.11     | MS analysis of RNA fragments from the cleavage of RNA 18 by <i>PNAzyme II</i> .....                            | 20 |
| S-3.12     | MS analysis of RNA fragments from the cleavage of RNA 19 by <i>PNAzyme III</i> .....                           | 21 |
| S-3.13     | The extent of cleavage of RNA 6 by <i>PNAzyme VII</i> .....                                                    | 22 |
| S-3.14     | MS analysis of RNA fragments from the cleavage of RNA 6 by <i>PNAzyme VII</i> .....                            | 23 |
| S-3.15     | The extent of cleavage of 4-nucleotide bulge-forming RNAs 4-12 by <i>PNAzyme I</i> .....                       | 24 |
| S-3.16     | MS analysis of RNA fragments from the cleavage of RNAs 4 and 11 by <i>PNAzyme I</i> .....                      | 26 |
| S-4.       | Circular Dichroism Spectroscopy of RNA/PNAzyme complexes .....                                                 | 29 |
| S-4.1      | Complexes where the bulge-closing base pair varies in the long recognition arm .....                           | 29 |
| S-4.2      | Complexes with a GT wobble vs a GC Watson-Crick base pair closing the bulge in the short recognition arm ..... | 29 |
| S-5.       | RNA cleavage experiments in the presence of Mg <sup>2+</sup> and K <sup>+</sup> .....                          | 30 |
| References | .....                                                                                                          | 31 |

## S-1. Purity analysis of PNA conjugates

The PNA conjugate PNAzyme I has been previously described and the RP-HPLC chromatograms of the crude and pure conjugate have been published.<sup>1</sup> The retention time of unconjugated PNA is around 15 min.<sup>1</sup>

Representative RP-HPLC chromatogram of the crude PNAzyme II:

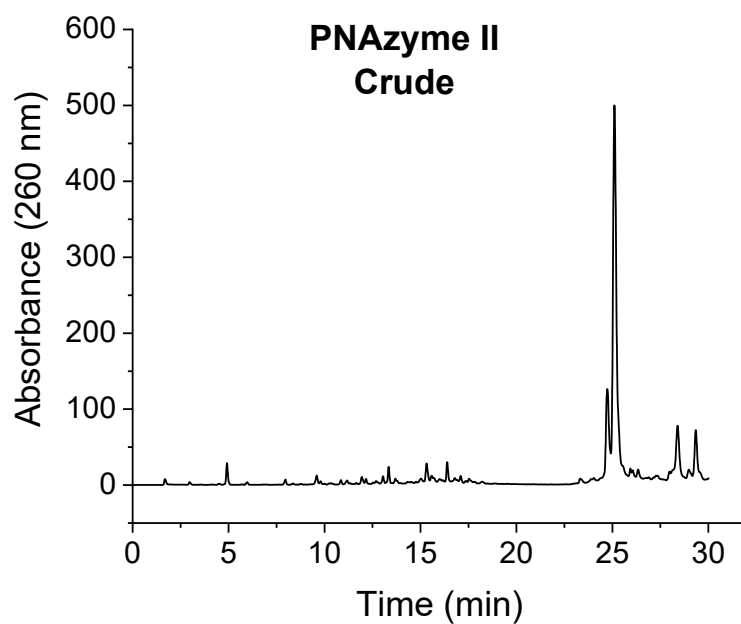

Purity analysis of purified PNA conjugates (PNAzymes II-XII):

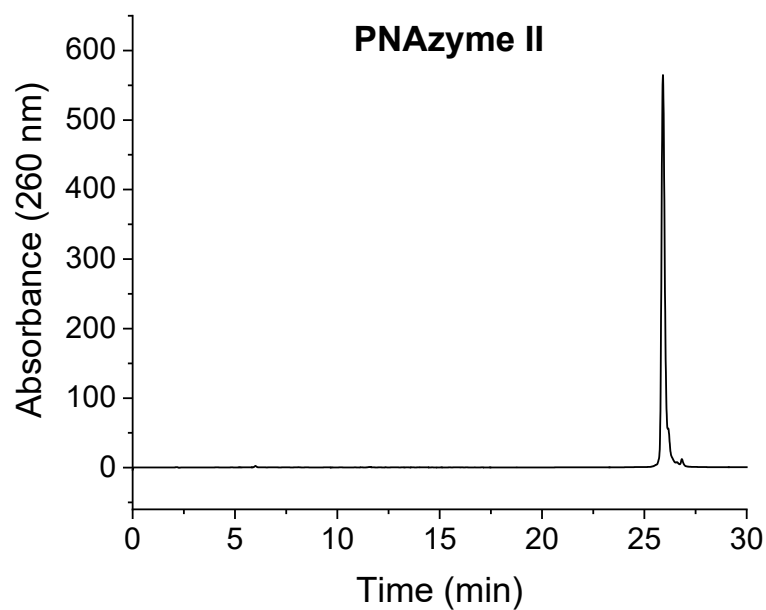

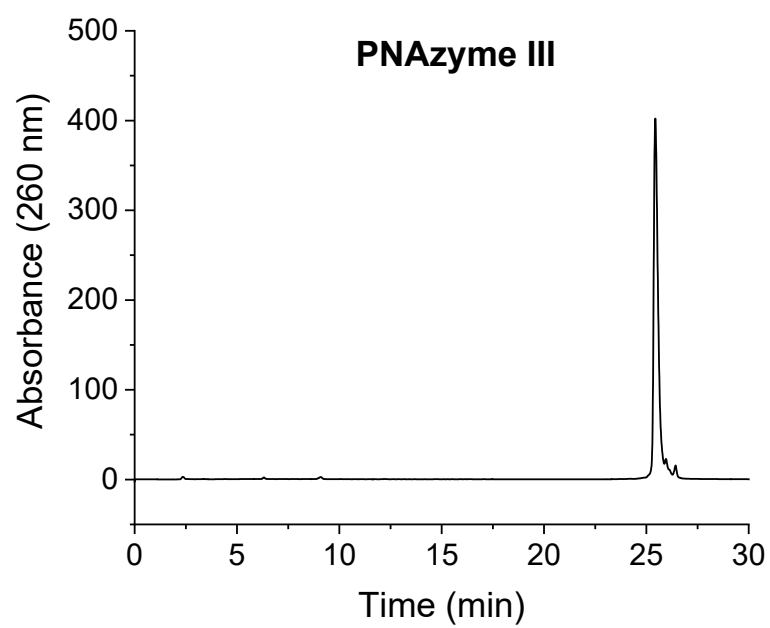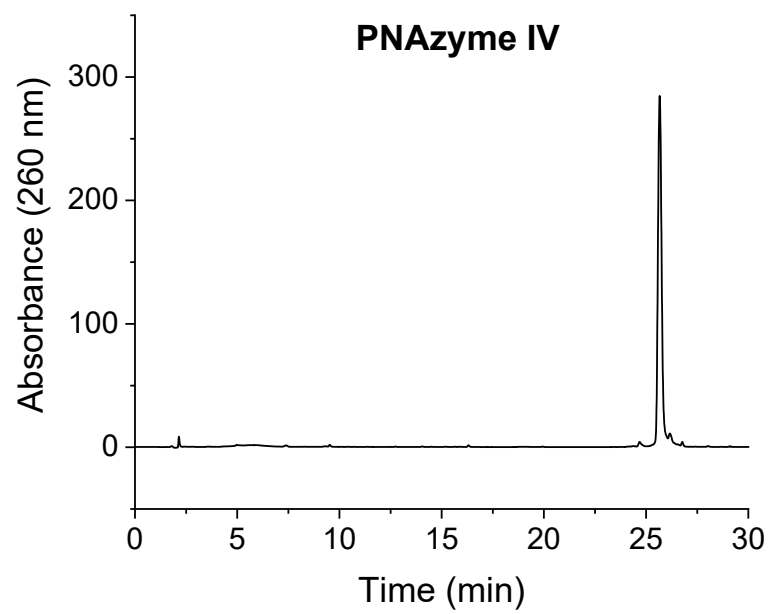

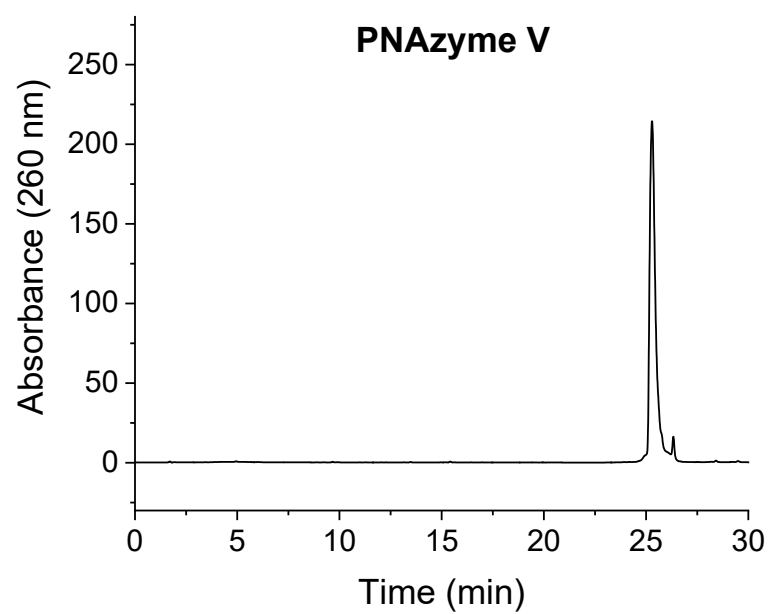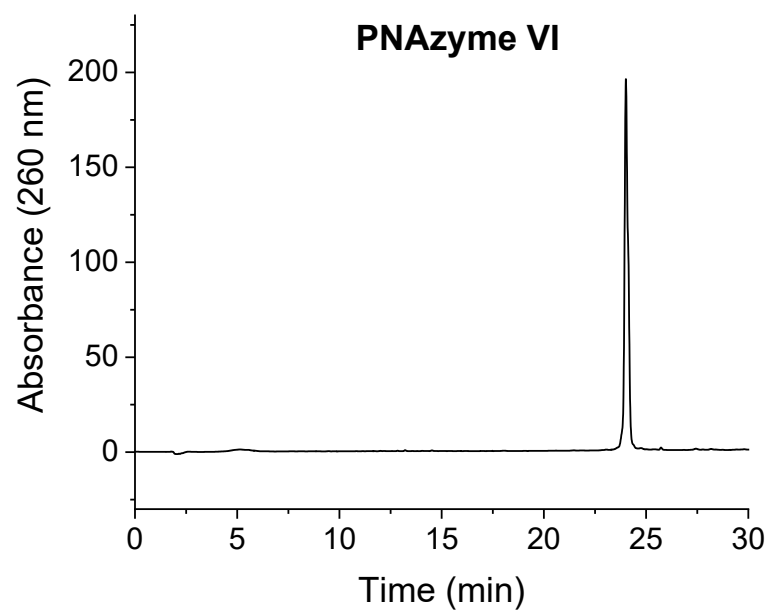

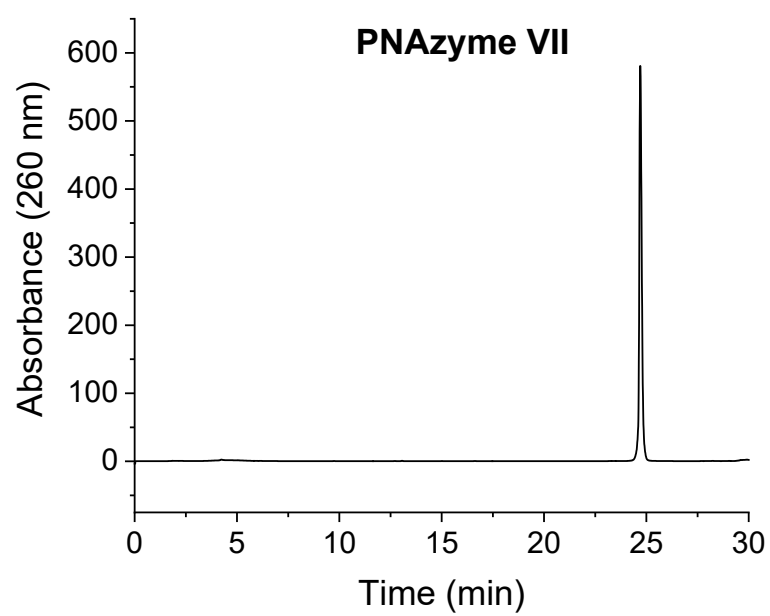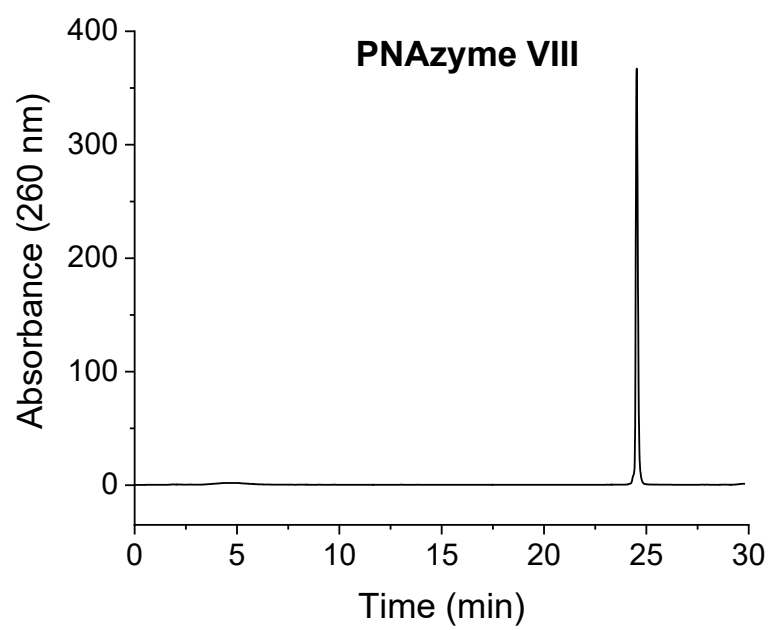

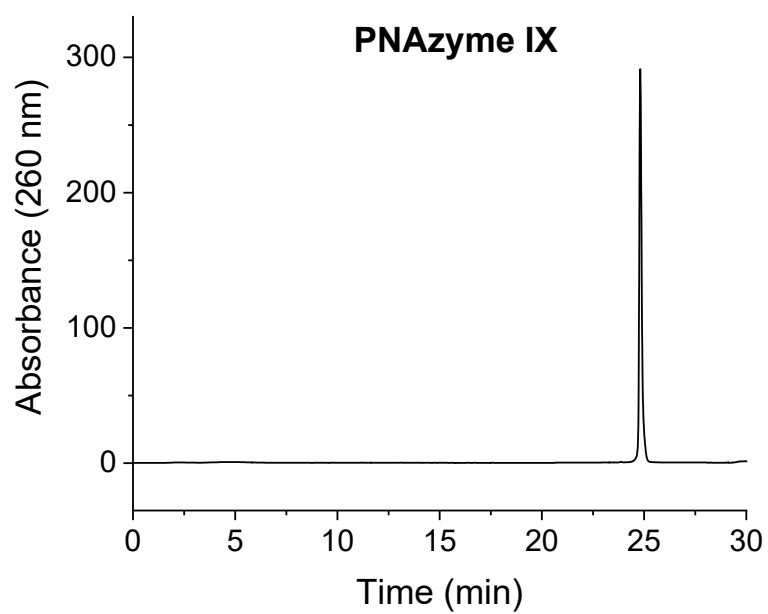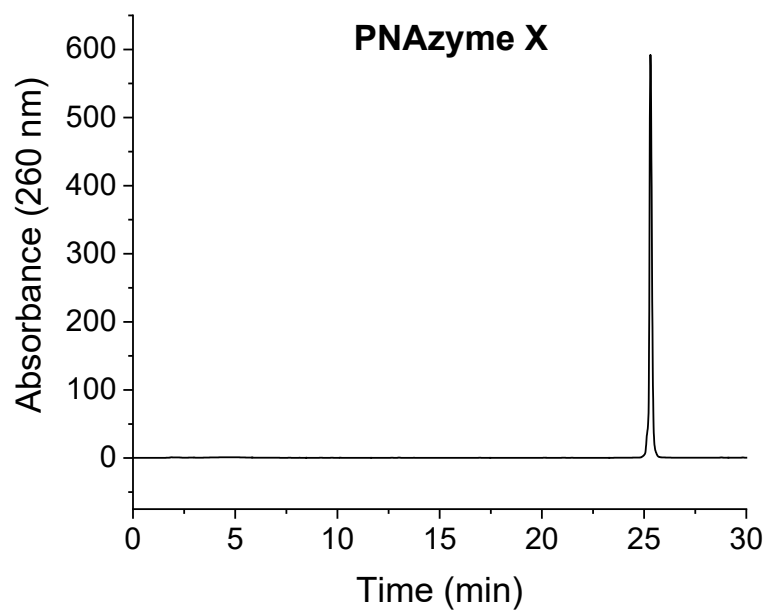

Representative RP-HPLC chromatogram of the crude PNAzyme XI:

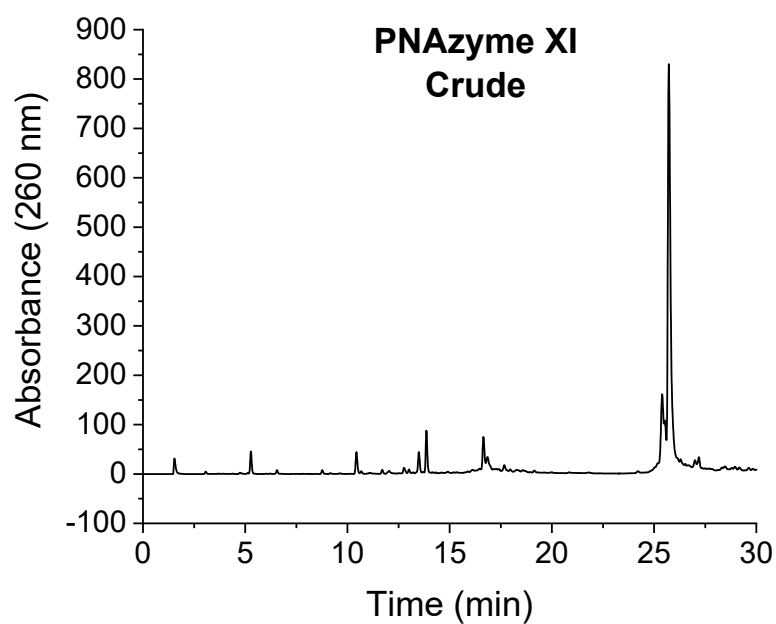

Purity analysis of purified PNAzymes XI and XII was performed using an extended method (0 to 33% buffer B in 40 min as opposed to the standard method<sup>1</sup> where the gradient is 0 to 40% buffer B in 30 min) leading to an increased retention time (~39-40 min).

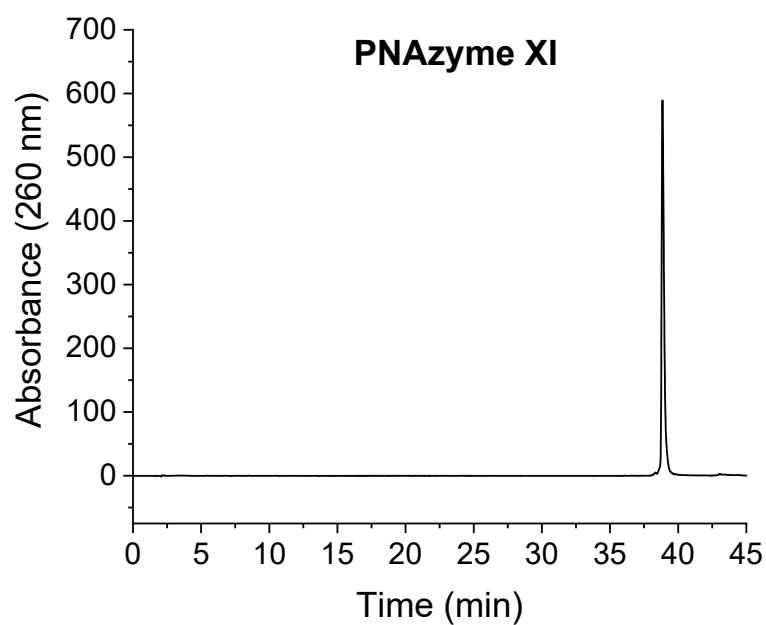

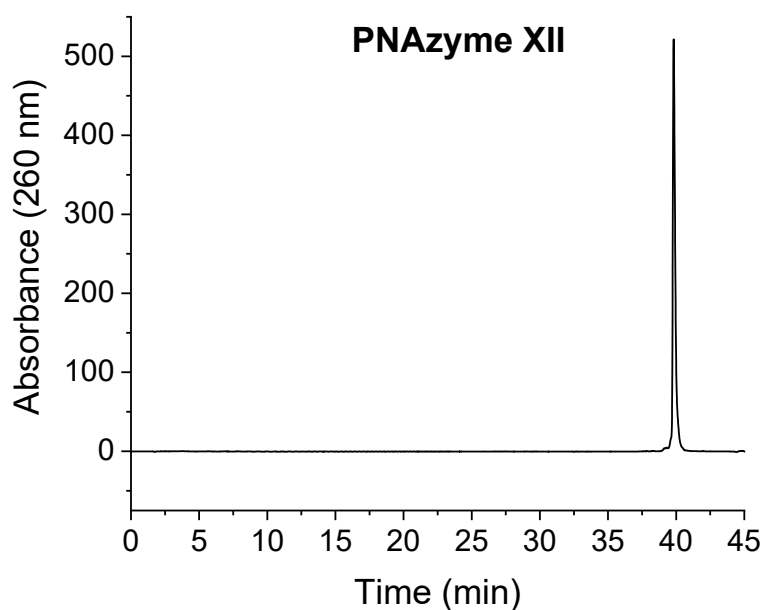

## S-2. RNA cleavage experiments

RNA cleavage experiments were performed and analysed as previously reported,<sup>1</sup> but for clarity we requote it here. RNA targets (0.16 nmol, 4  $\mu$ M final concentration, except in turnover experiments where the RNA concentration was 100  $\mu$ M RNA) were equilibrated in appropriate amounts of water, HEPES buffer (10 mM HEPES, 0.1 M NaCl final concentration) and EDTA (10  $\mu$ M final concentration) over a 15-minute period at 37 °C. This was followed by the addition of  $\text{Zn}(\text{NO}_3)_2$  (aq) solution (110  $\mu$ M  $\text{Zn}^{2+}$  which in the presence of the previously added 10  $\mu$ M EDTA results in 100  $\mu$ M accessible zinc ions), the PNAzyme (1.4 equiv relative to RNA, 5.6  $\mu$ M, except in turnover experiments where the PNAzyme concentration was 3  $\mu$ M). The reaction mixtures were then allowed to incubate at 37 °C. The reactions were quenched at specified time points with EDTA (70  $\mu$ L of 2 mM EDTA in 30% MeCN/milliQ). The samples were analysed by anion exchange HPLC (IE-HPLC) using a Dionex NucleoPac PA-100 (4  $\times$  250 mm) column with a linear gradient elution of 0–45% buffer B over 30 min at 60 °C. A flow rate of 1.5 mL/min was used and UV detection was carried out at 260 nm. The following solvent system was used: (A) 20 mM NaOAc in 30% aq. MeCN and (B) 20 mM NaOAc, 0.4 M  $\text{LiClO}_4$  in 30% aq. MeCN. The extent of cleavage of RNA substrates was based on the quantification of the remaining intact RNA target and the sum of the formed RNA fragments detected in the IE-HPLC analysis. Representative chromatograms are provided. The % RNA cleavage values presented are average values of at least two experiments (except in turnover experiments where the reported values are the mean cleavage of at least five experiments) with a standard deviation of less than  $\pm 3\%$  unless otherwise specified.

## S-3. Analysis of RNA Cleavage by IEX-HPLC and ESI-TOF MS

### S-3.1 The extent of cleavage of AAA bulges in RNAs 2-5 by the corresponding *PNazymes II-V*

Timepoints at which the aliquots were quenched are shown on each chromatogram. These data are shown in Fig 2 and 3 in the main text.

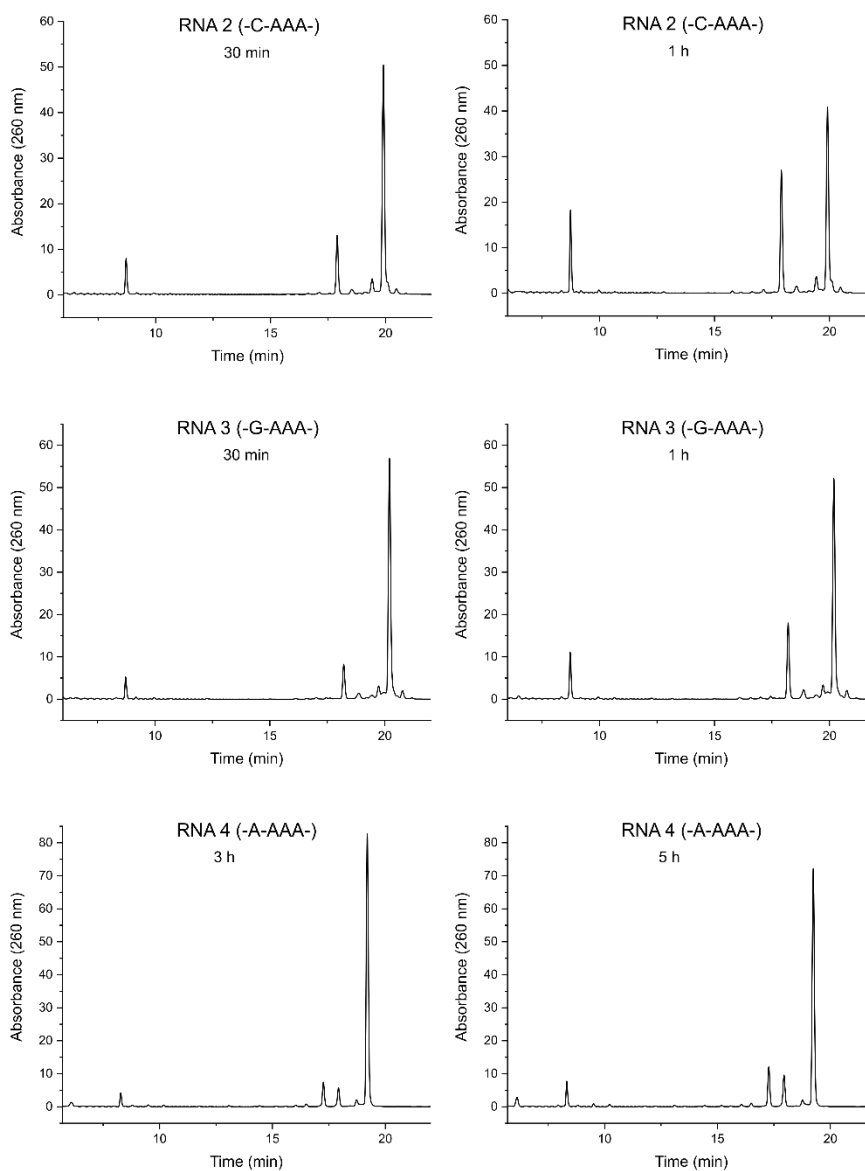

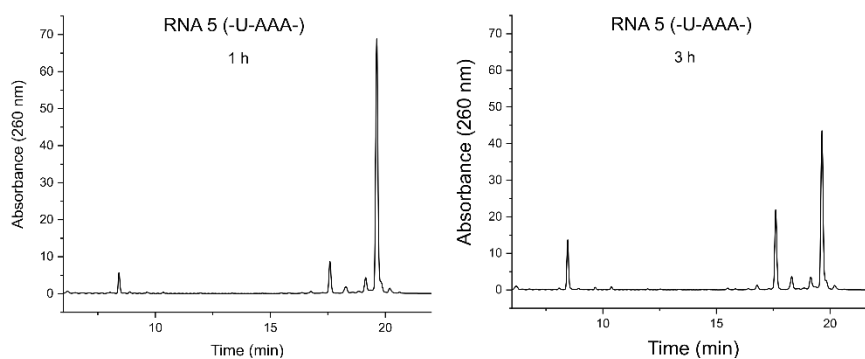

### S-3.2 MS analysis of RNA fragments from the cleavage of RNAs 2-4 by *PNAzymes II-IV*

RNA 2 cleavage fragment 1 (5'-AGCCC-3')  $C_{47}H_{61}N_{19}O_{32}P_4$

Monoisotopic mass calc. 1527.268, obs. 1526.285.

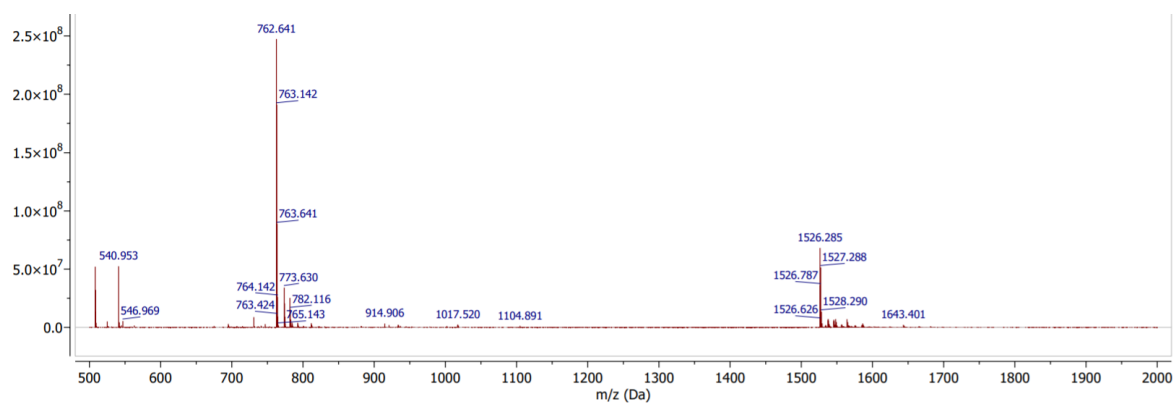

RNA 2 cleavage fragment 2 (2',3'-cyclic phosphate, 5'-AGAGUUC-C-AA-3')  $C_{96}H_{118}N_{40}O_{68}P_{10}$

Monoisotopic mass calc. 3228.438, obs. 3228.495.

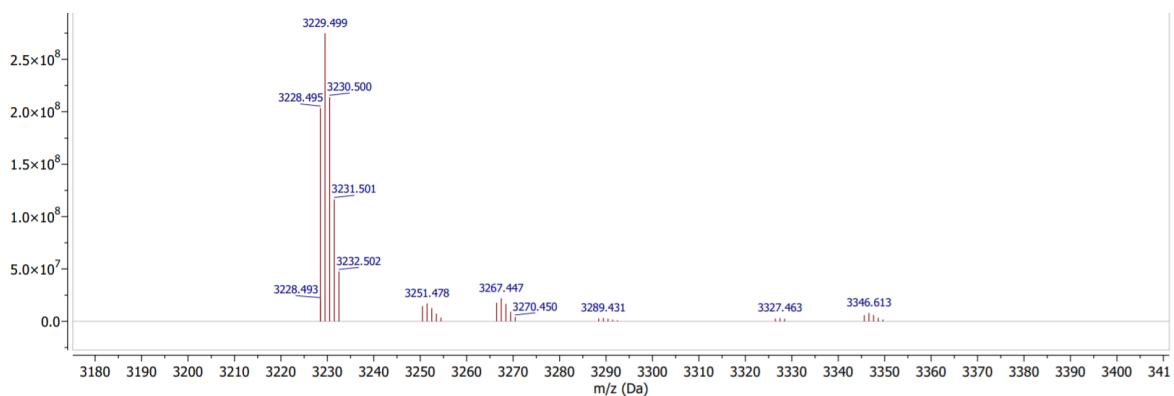

RNA 3 cleavage fragment 1 (5'-AGCCC-3')  $C_{47}H_{61}N_{19}O_{32}P_4$

Monoisotopic mass calc. 1527.268, obs. 1526.285.

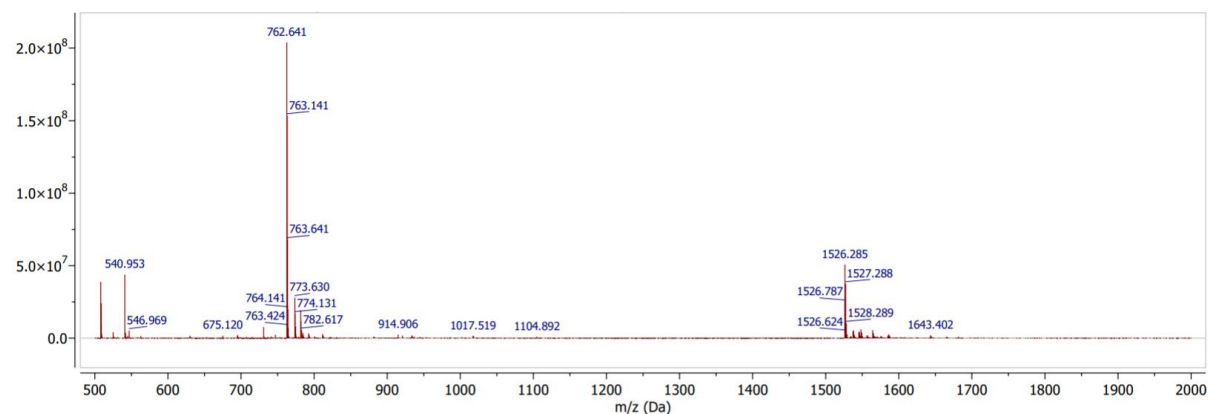

RNA 3 cleavage fragment 2 (2',3'-cyclic phosphate, 5'-AGAGUUC-G-AA-3')  $C_{97}H_{118}N_{42}O_{68}P_{10}$

Monoisotopic mass calc. 3268.444, obs. 3268.498

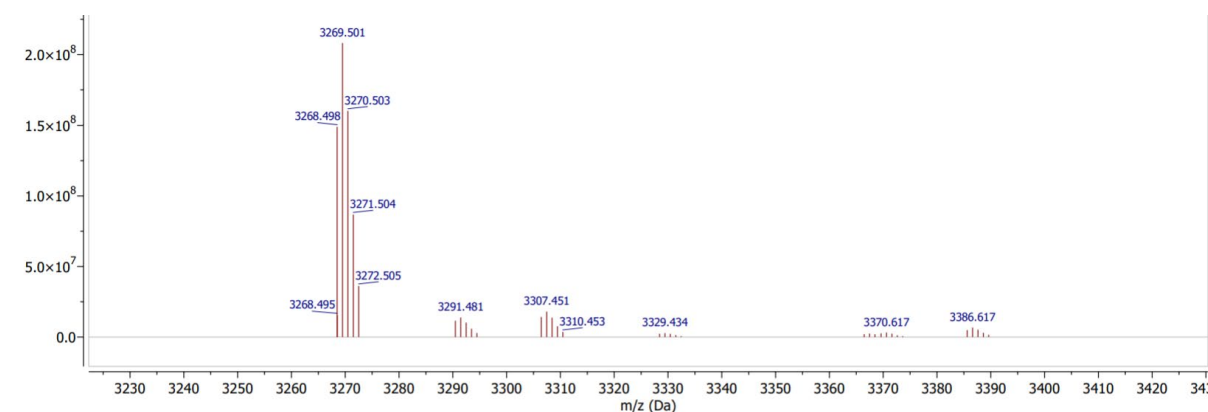

RNA 4 cleavage fragment 1 (5'-AGCCC-3')  $C_{47}H_{61}N_{19}O_{32}P_4$

Monoisotopic mass calc. 1527.268, obs. 1527.295.

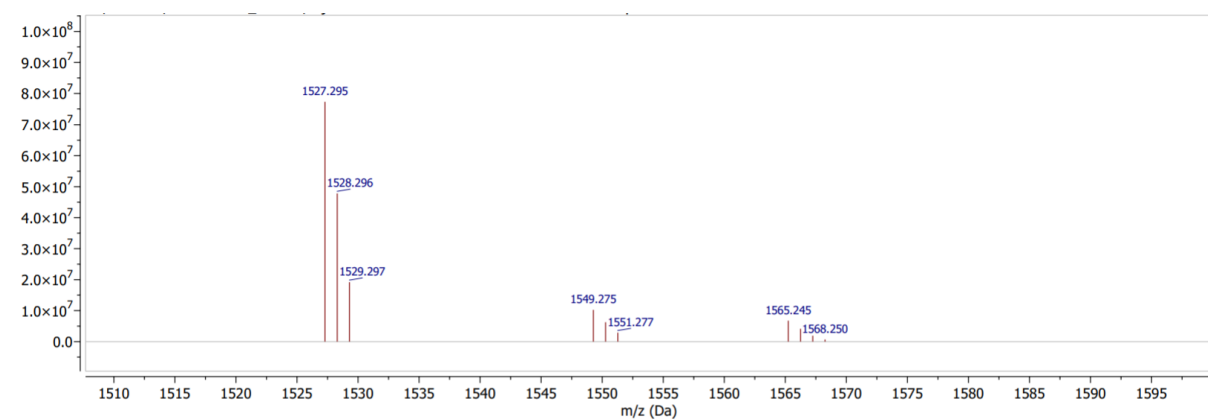

RNA 4 cleavage fragment 2 (2',3'-cyclic phosphate, 5'-AGAGUUC-A-AA-3')  $C_{97}H_{118}N_{42}O_{67}P_{10}$   
 Monoisotopic mass calc. 3252.449, obs. 3252.507

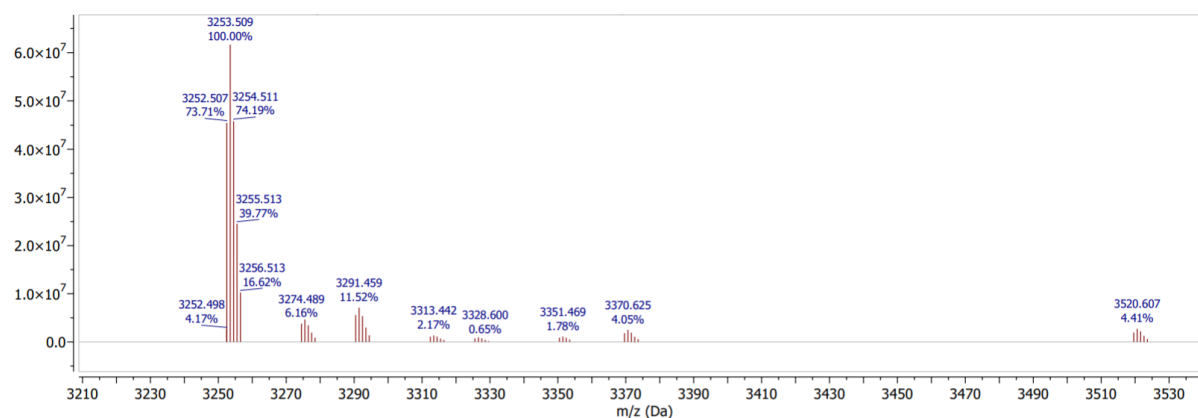

RNA 4 cleavage fragment 3 (2',3'-cyclic phosphate, 5'-AGAGUUC-A-AAA-3')  $C_{107}H_{130}N_{47}O_{73}P_{11}$   
 Monoisotopic mass calc. 3581.502, obs. 3581.561

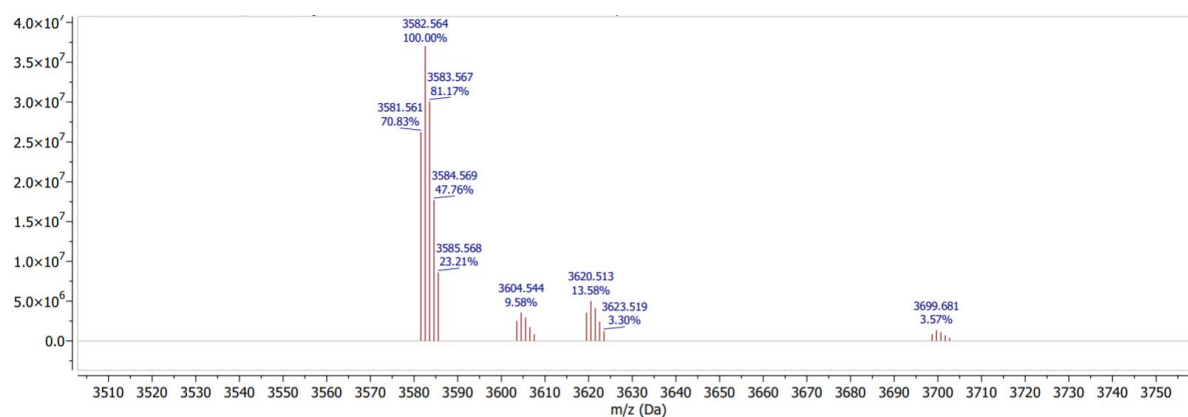

### S-3.3 The extent of cleavage of 3-nucleotide bulge-forming RNAs 6-9 by *PNazyme IV*

Timepoints at which the aliquots were quenched are shown on each chromatogram. These data are shown in Fig 3 in the main text.

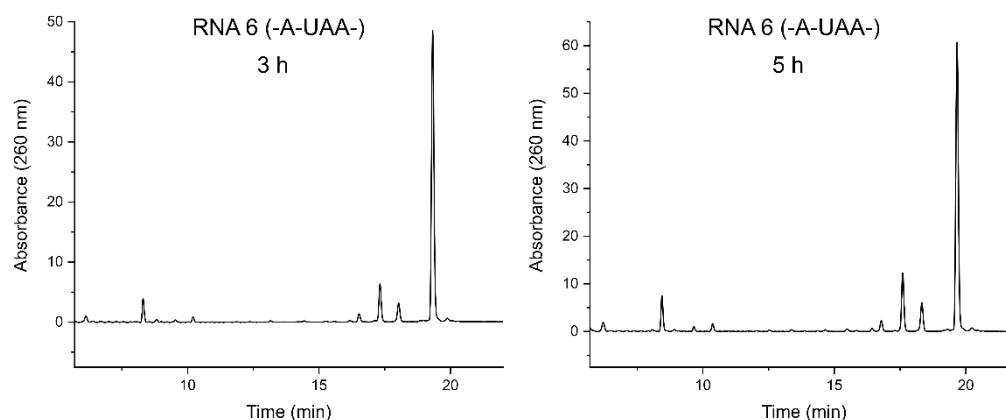

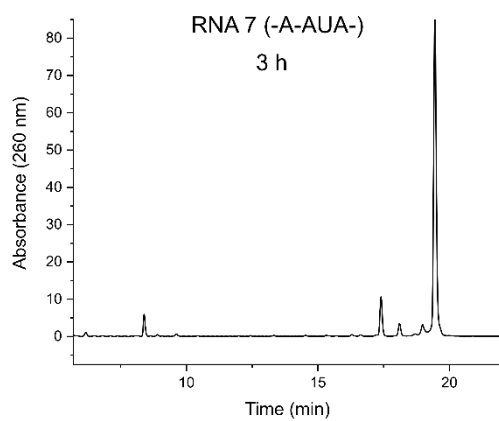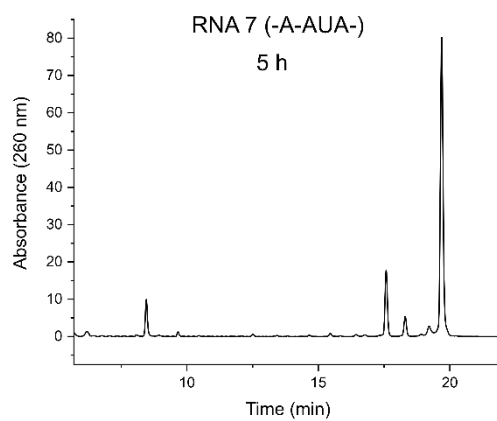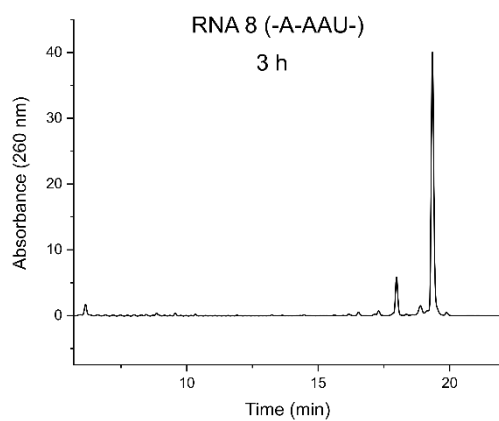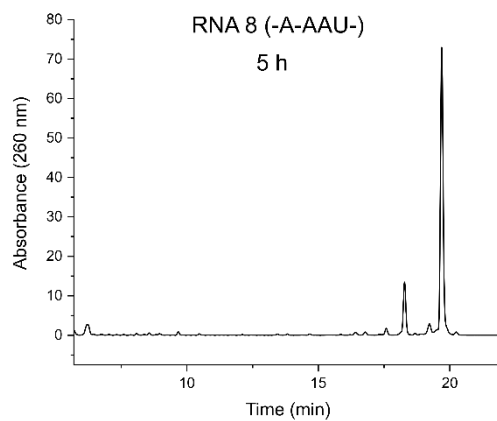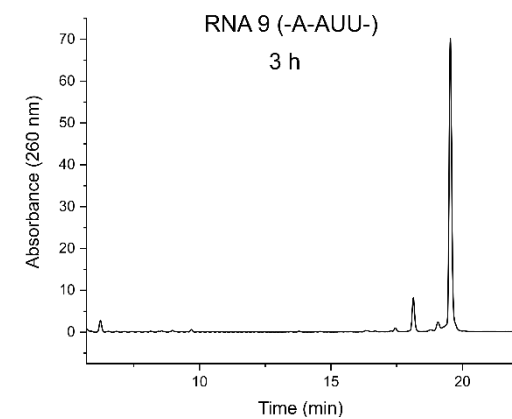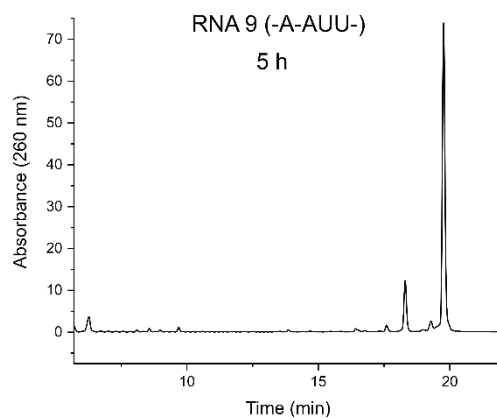

### S-3.4. The extent of cleavage of 3-nucleotide bulge-forming RNAs 10-12 by *PNAzyme V*

Timepoints at which the aliquots were quenched are shown on each chromatogram. These data are shown in Fig 3 in the main text.

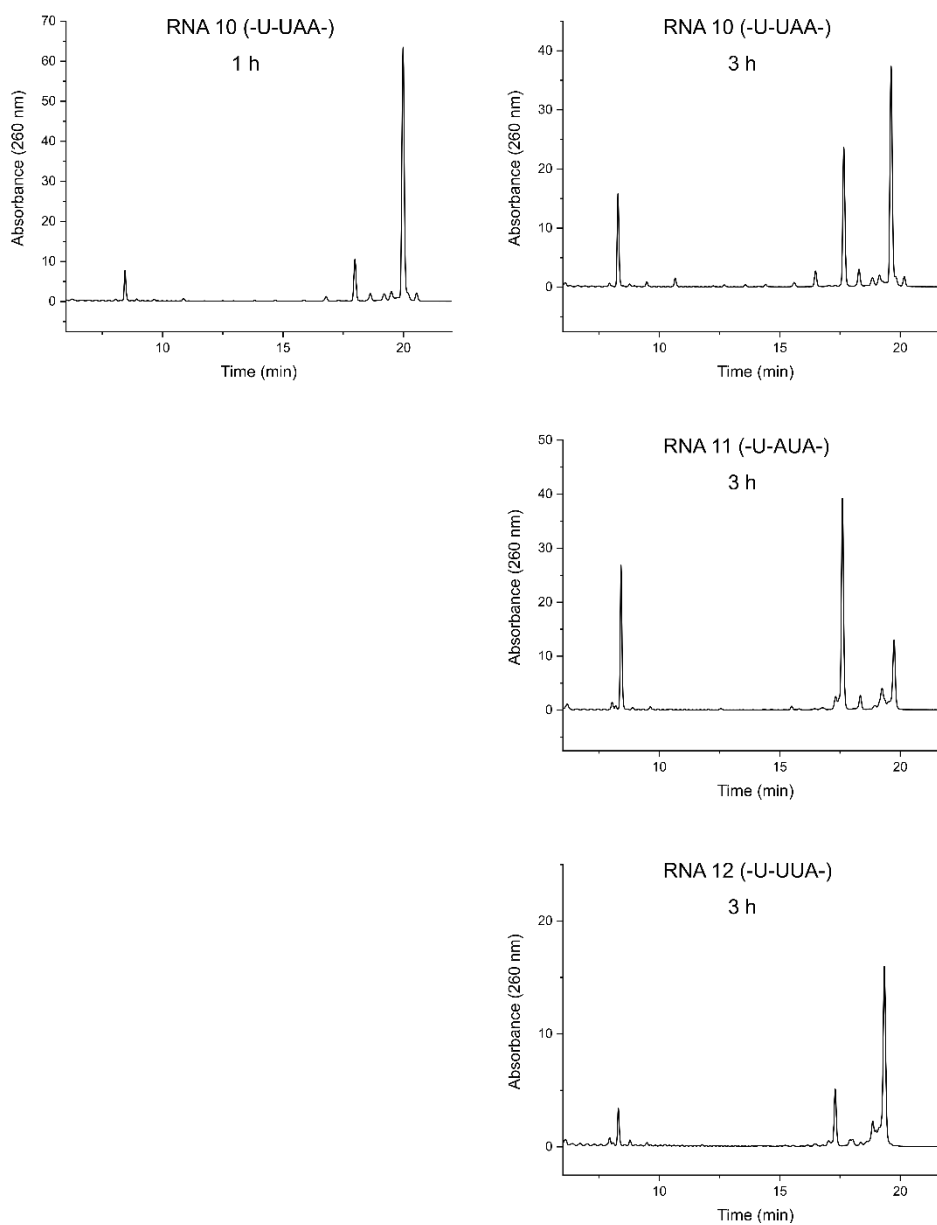

### S-3.5. MS analysis of RNA fragments from the cleavage of RNA 11 by *PNAzyme V*

RNA 11 cleavage fragment 1 (5'-AGCCC-3')  $C_{47}H_{61}N_{19}O_{32}P_4$

Monoisotopic mass calc. 1527.268, obs. 1527.299.

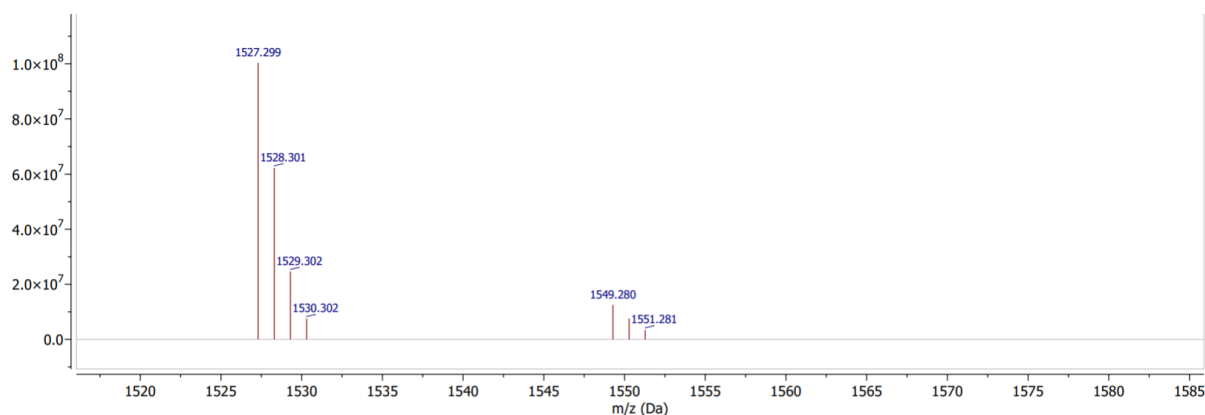

RNA 11 cleavage fragment 2 (2',3'-cyclic phosphate, 5'-AGAGUUC-U-AU-3')  $C_{95}H_{116}N_{36}O_{71}P_{10}$

Monoisotopic mass calc. 3206.395 obs. 3206.461

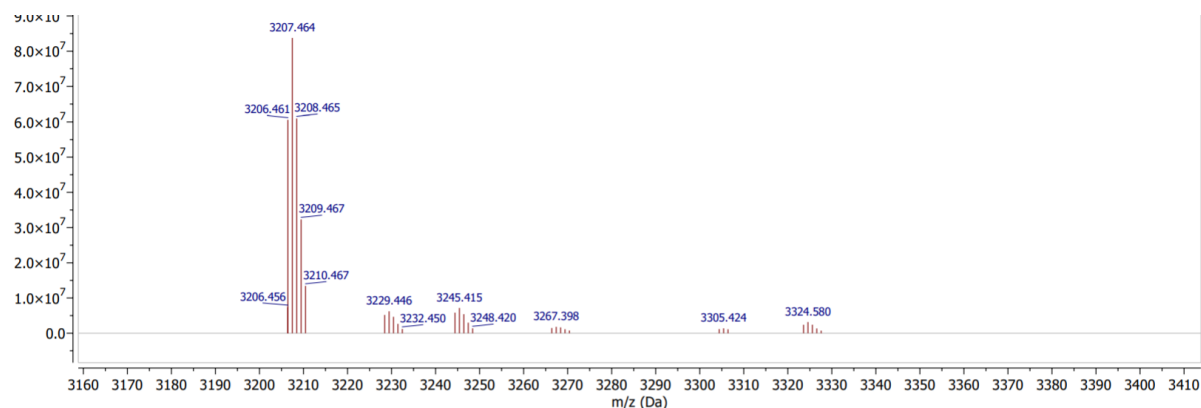

### S-3.6. The extent of cleavage of 2-nucleotide bulge-forming RNAs 13-15 by *PNAzyme IV*

Timepoints at which the aliquots were quenched are shown on each chromatogram. These data are summarised in Fig 4 in the main text.

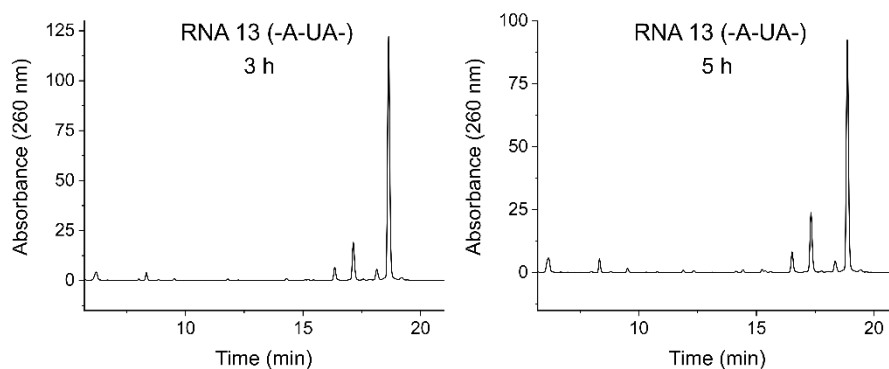

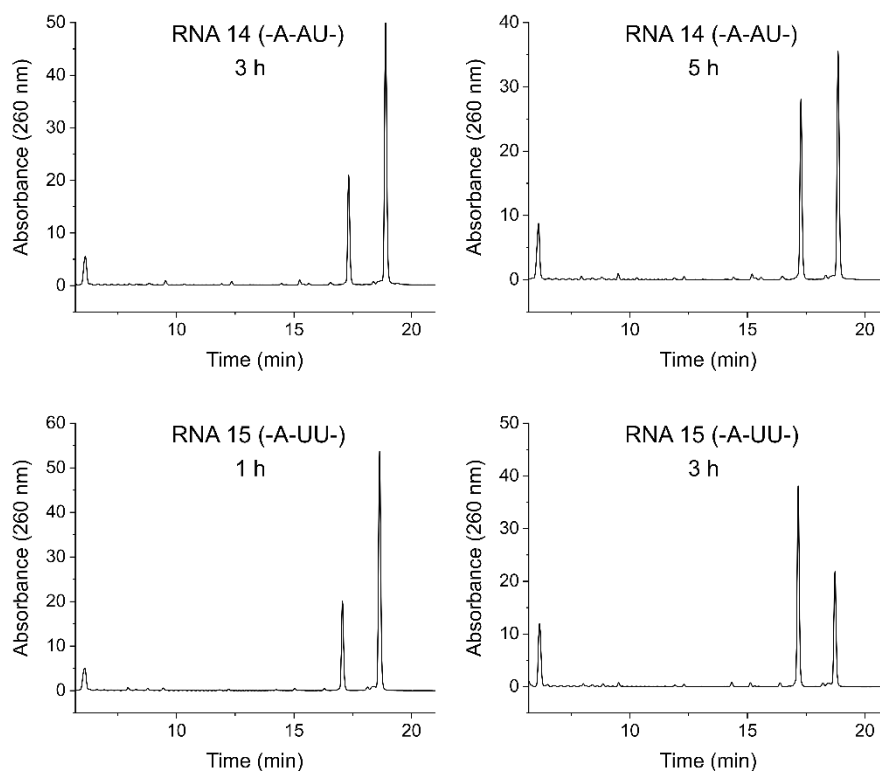

### S-3.7. MS analysis of RNA fragments from the cleavage of RNAs 13, 15 by *PNAzyme IV*

RNA 13 cleavage fragment 1 (5'-AGCCC-3')  $C_{47}H_{61}N_{19}O_{32}P_4$

Monoisotopic mass calc. 1527.268, obs. 1527.298.

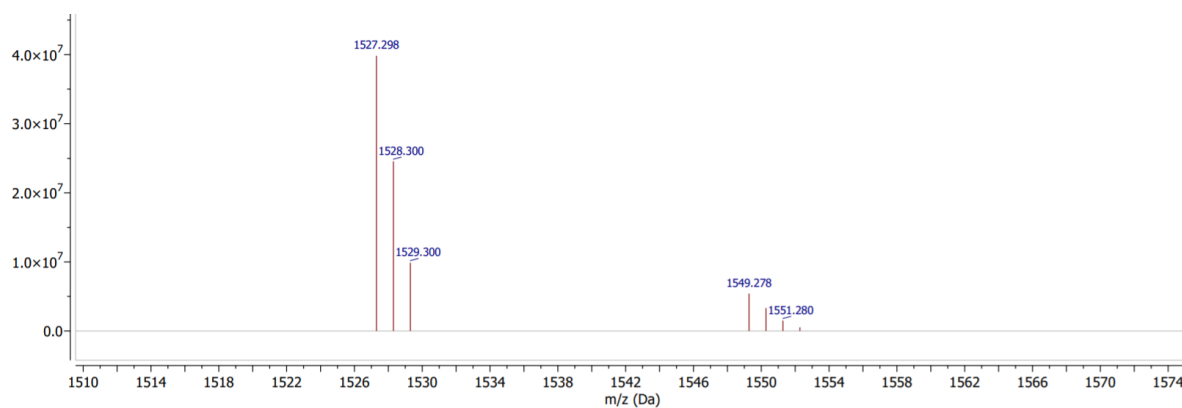

RNA 13 cleavage fragment 2 (2',3'-cyclic phosphate, 5'-AGAGUUC-A-U-3')  $C_{86}H_{105}N_{34}O_{63}P_9$   
 Monoisotopic mass calc. 2900.370 obs. 2900.425

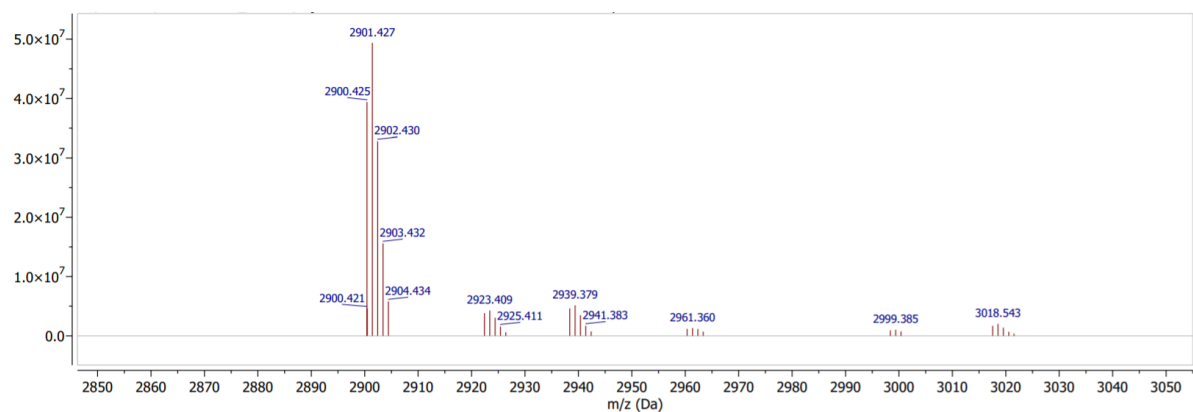

RNA 13 cleavage fragment 3 (2',3'-cyclic phosphate, 5'-AGAGUUC-A-UA-3')  $C_{96}H_{117}N_{39}O_{69}P_{10}$   
 Monoisotopic mass calc. 3229.422 obs. 3229.488

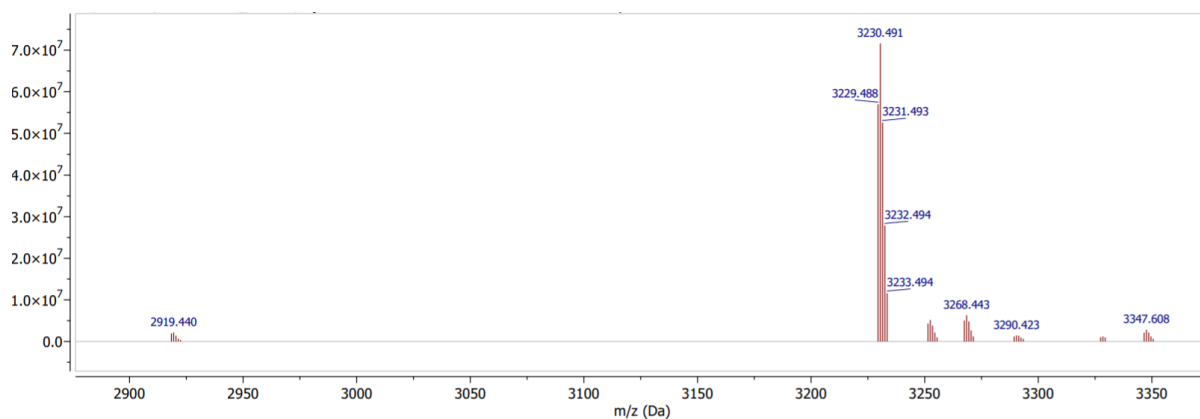

RNA 15 cleavage fragment 1 (2',3'-cyclic phosphate, 5'-AGA-GUUC-A-UU-3')  $C_{95}H_{116}N_{36}O_{71}P_{10}$   
 Monoisotopic mass calc. 3206.395, obs. 3206.458.

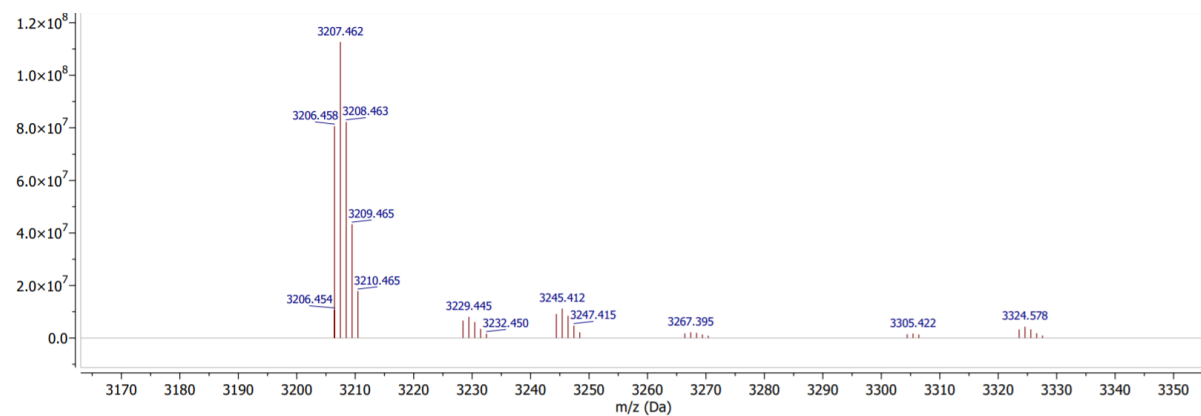

### S-3.8. The extent of cleavage of 2-nucleotide bulge-forming RNAs 16-17 by *PNAzyme V*

Timepoints at which the aliquots were quenched are shown on each chromatogram. These data are summarised in Fig 4 in the main text.

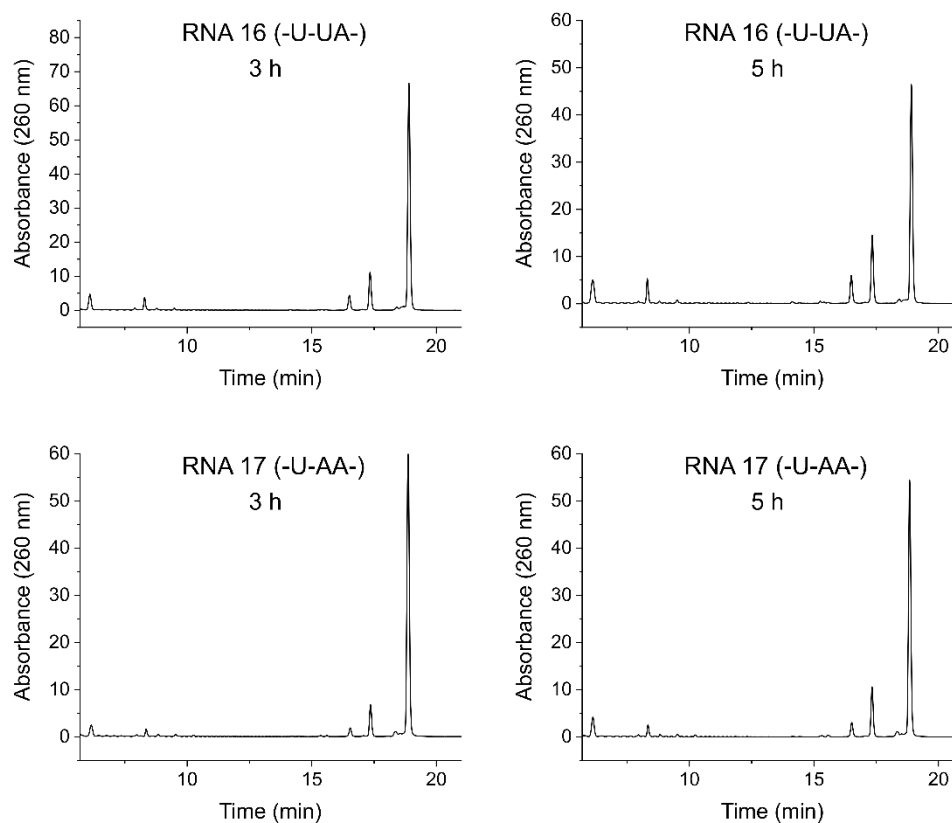

### S-3.9. MS analysis of RNA fragments from the cleavage of RNA 17 by *PNAzyme V*

RNA 17 cleavage fragment 1 (5'-AGCCC-3')  $C_{47}H_{61}N_{19}O_{32}P_4$

Monoisotopic mass calc. 1527.268, obs. 1527.298.

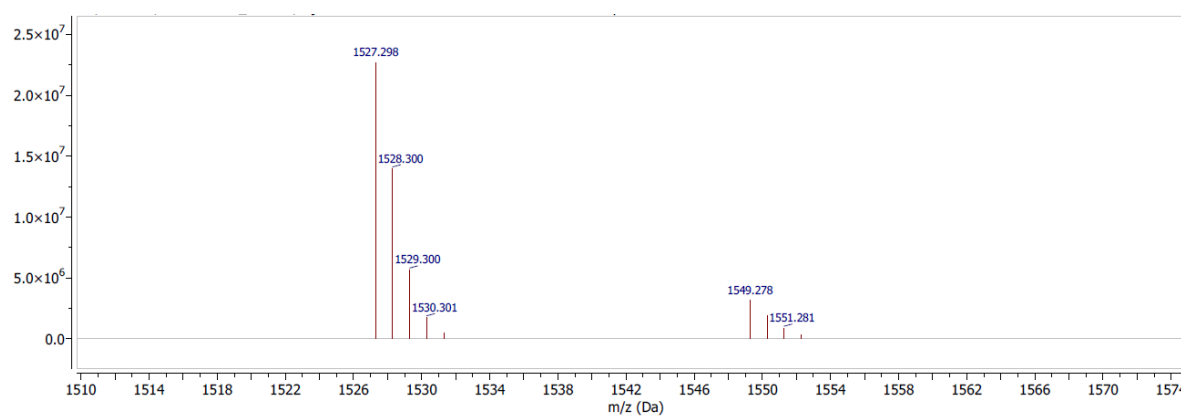

RNA 17 cleavage fragment 2 (2',3'-cyclic phosphate 5'-AGA-GUUC-U-A-3')  $C_{86}H_{105}N_{34}O_{63}P_9$   
 Monoisotopic mass calc. 2900.370, obs. 2900.425.

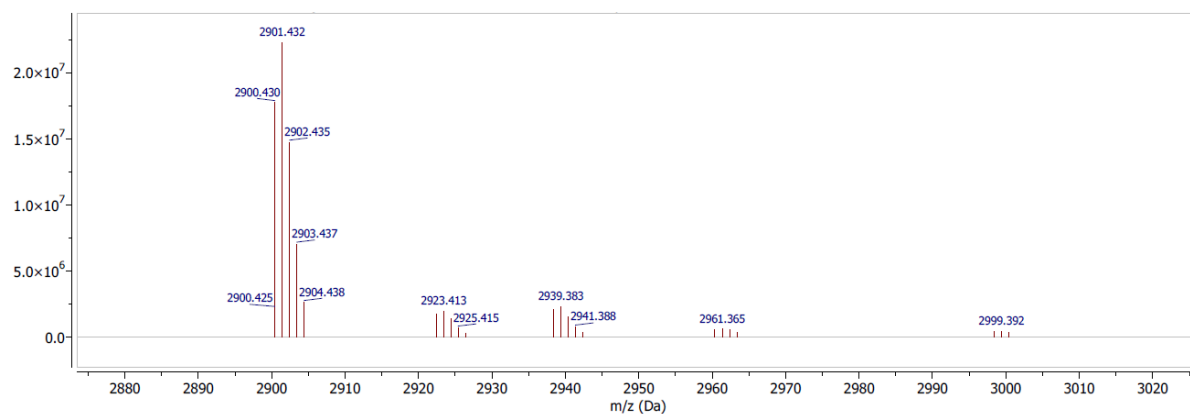

RNA 17 cleavage fragment 3 (2',3'-cyclic phosphate 5'-AGA-GUUC-U-AA-3')  $C_{96}H_{117}N_{39}O_{69}P_{10}$   
 Monoisotopic mass calc. 3229.422, obs. 3229.480.

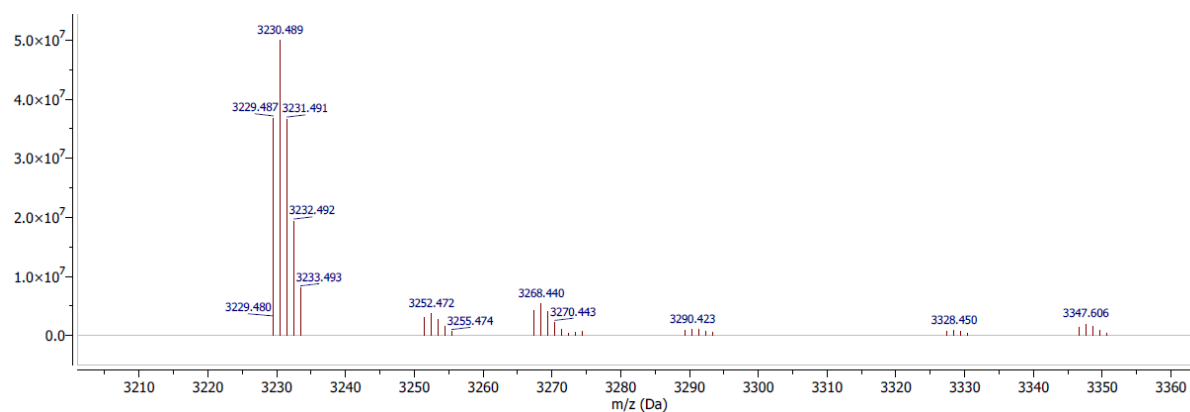

### S-3.10 The extent of cleavage of UA bulges in RNAs 18-19 by *PNAzymes II-III*

Timepoints at which the aliquots were quenched are shown on each chromatogram. These data are summarised in Fig 4 in the main text.

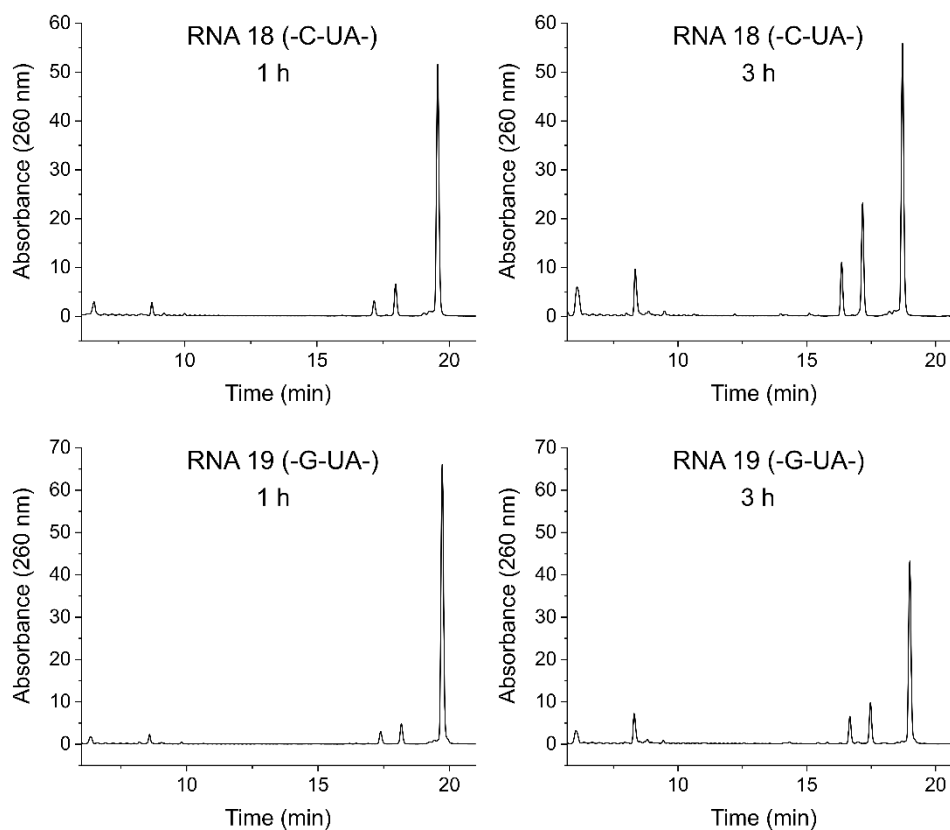

### S-3.11. MS analysis of RNA fragments from the cleavage of RNA 18 by *PNAzyme II*

RNA 18 cleavage fragment 1 (5'-AGCCC-3')  $C_{47}H_{61}N_{19}O_{32}P_4$

Monoisotopic mass calc. 1527.268, obs. 1526.285.

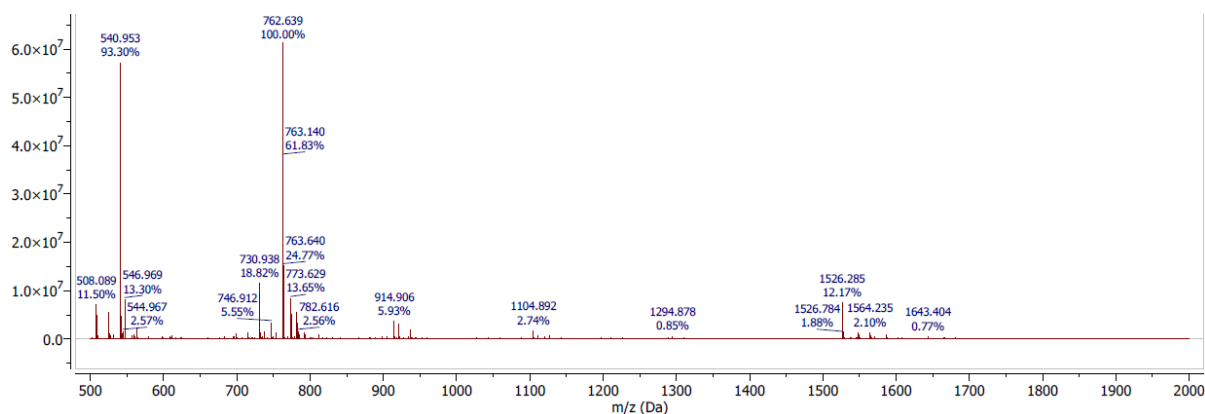

RNA 18 cleavage fragment 2 (2',3'-cyclic phosphate 5'-AGA-GUUC-C-U-3')  $C_{85}H_{105}N_{32}O_{64}P_9$   
 Monoisotopic mass calc. 2876.358, obs. 2876.408.

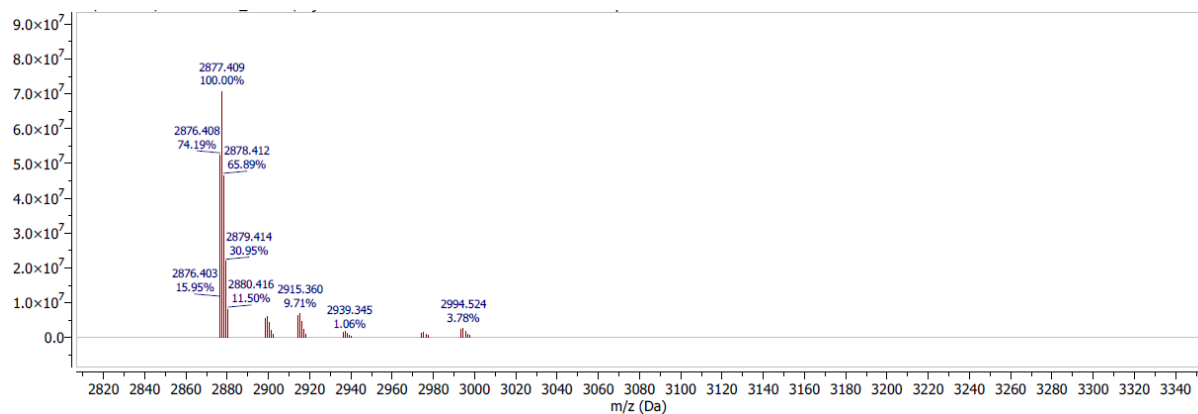

RNA 18 cleavage fragment 3 (2',3'-cyclic phosphate 5'-AGA-GUUC-C-UA-3')  $C_{95}H_{117}N_{37}O_{70}P_{10}$   
 Monoisotopic mass calc. 3205.410, obs. 3205.461

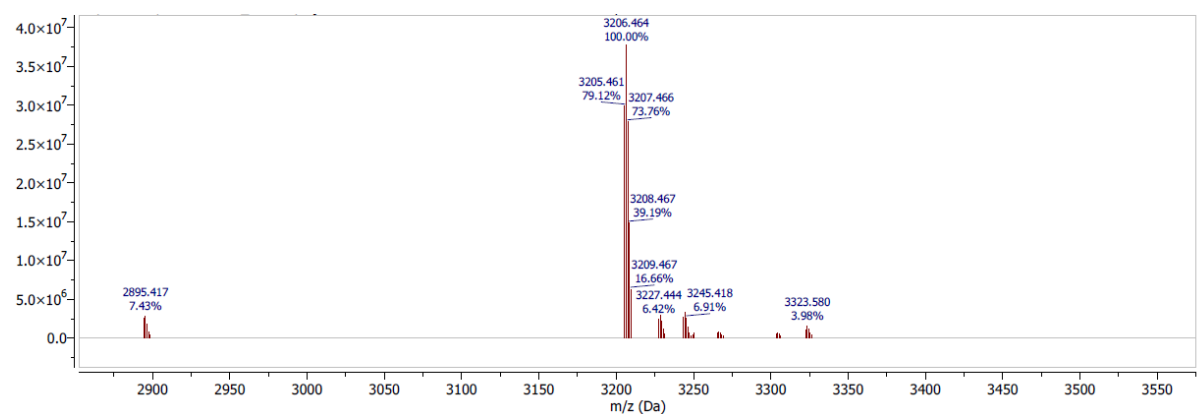

### S-3.12. MS analysis of RNA fragments from the cleavage of RNA 19 by *PNAzyme III*

RNA 19 cleavage fragment 1 (5'-AGCCC-3')  $C_{47}H_{61}N_{19}O_{32}P_4$   
 Monoisotopic mass calc. 1527.268, obs. 1526.285.

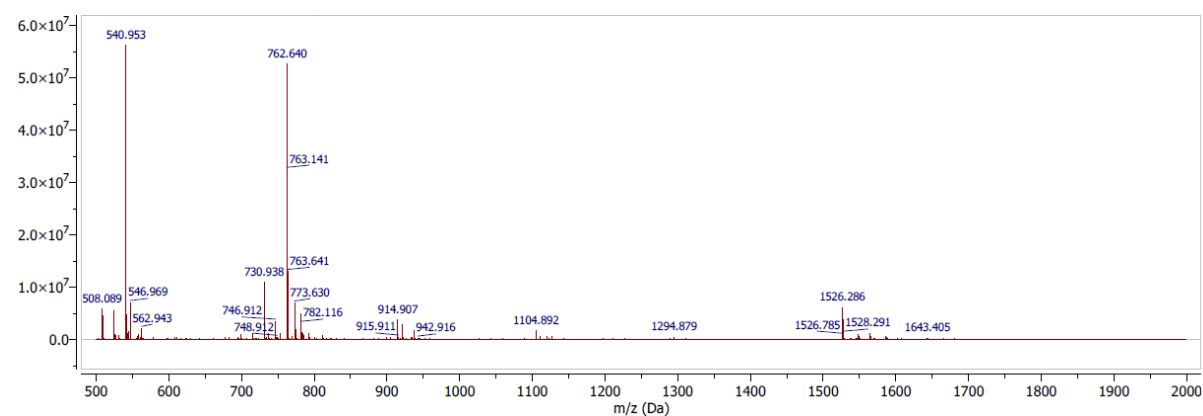

RNA 19 cleavage fragment 2 (2',3'-cyclic phosphate 5'-AGA-GUUC-G-U-3')  $C_{86}H_{105}N_{34}O_{64}P_9$   
 Monoisotopic mass calc. 2916.365, obs. 2916.414.

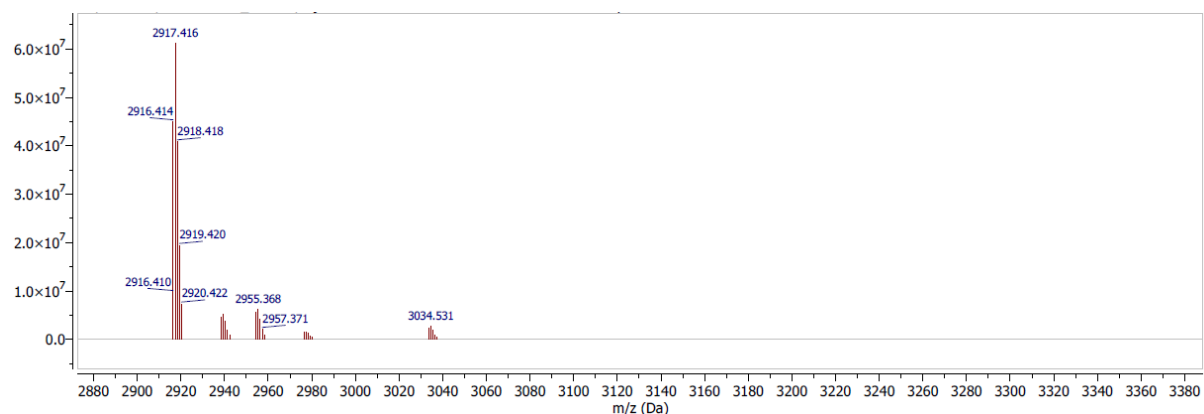

RNA 19 cleavage fragment 3 (2',3'-cyclic phosphate 5'-AGA-GUUC-G-UA-3')  $C_{96}H_{117}N_{39}O_{70}P_{10}$   
 Monoisotopic mass calc. 3245.417, obs. 3245.469.

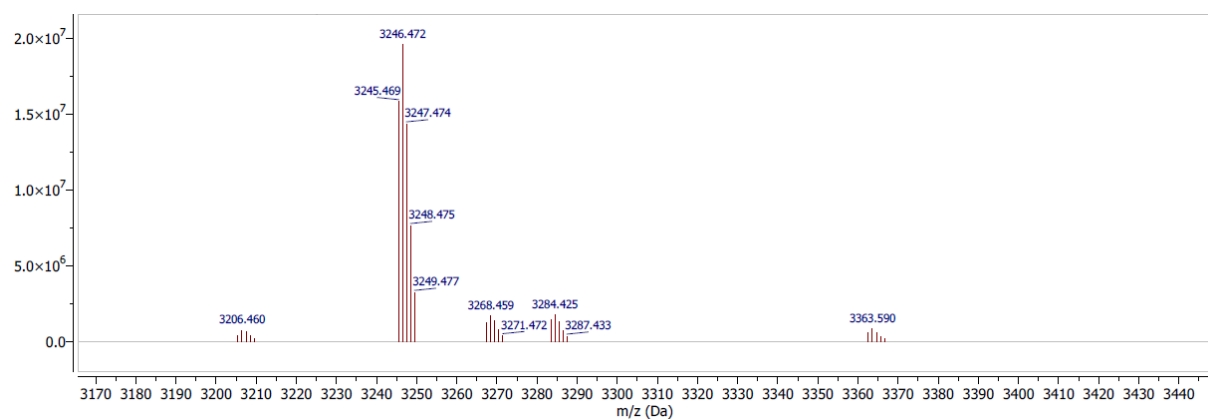

### S-3.13 The extent of cleavage of RNA 6 by *PNAzyme VII*

Timepoints at which the aliquots were quenched are shown on each chromatogram. These data are summarised in Fig 5 in the main text.

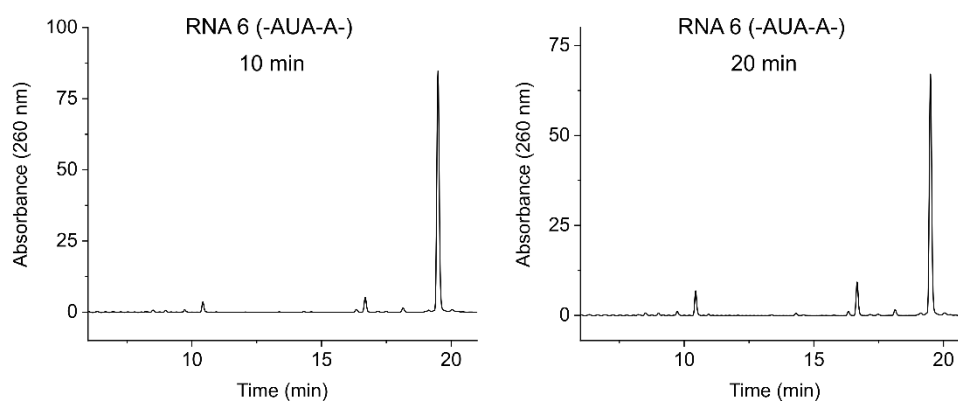

### S-3.14. MS analysis of RNA fragments from the cleavage of RNA 6 by *PNase VII*

RNA 6 cleavage fragment 1 (5'-A-AGCCC-3')  $C_{57}H_{73}N_{24}O_{38}P_5$

Monoisotopic mass calc. 1856.321, obs. 1856.357.

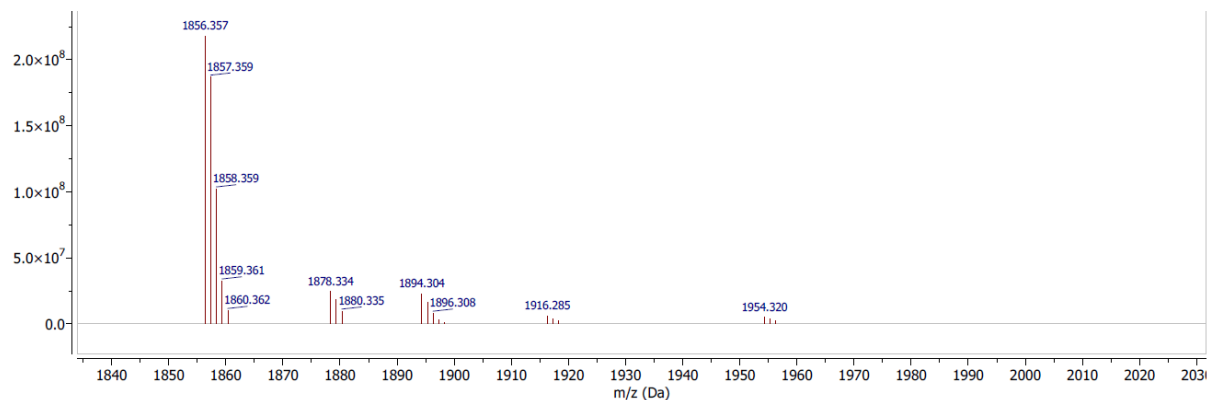

RNA 6 cleavage fragment 2 (2',3'-cyclic phosphate 5'-AGA-GUUC-AU-3')  $C_{86}H_{105}N_{34}O_{63}P_9$

Monoisotopic mass calc. 2900.370, obs. 2900.424.

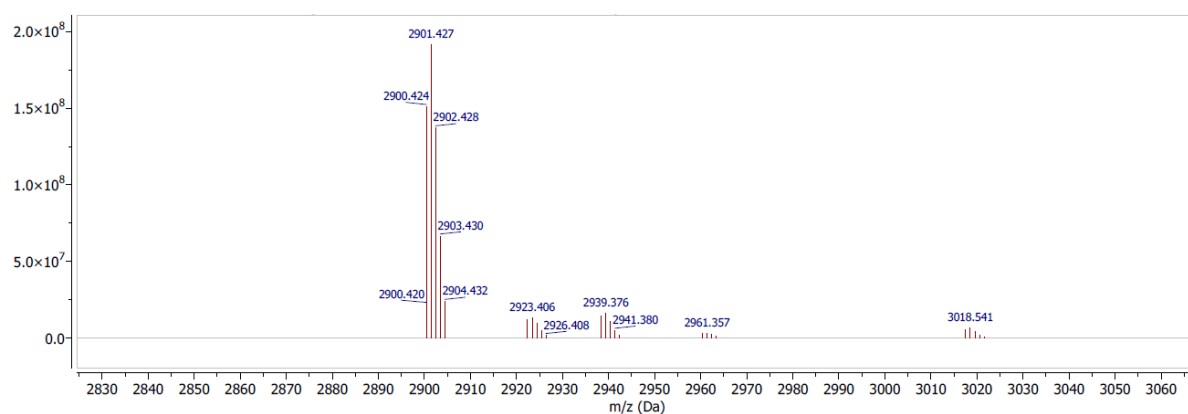

### S-3.15 The extent of cleavage of 4-nucleotide bulge-forming RNAs 4-12 by *PNAzyme I*

Timepoints at which the aliquots were quenched are shown on each chromatogram. These data are summarised in Fig 8 in the main text. The chromatogram corresponding to the cleavage of RNA 4 by *PNAzyme I* in 3 h has been reported previously.<sup>1</sup>

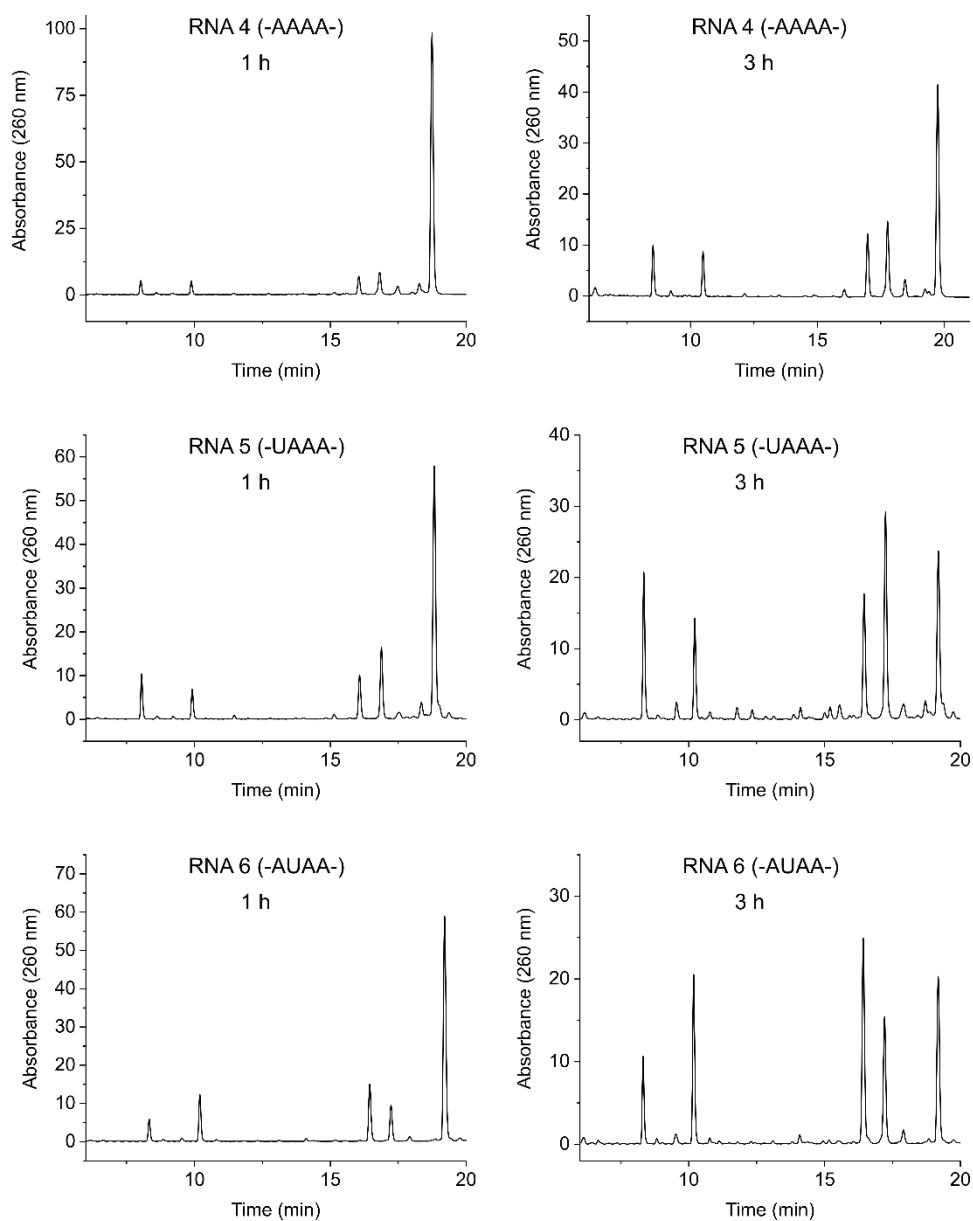

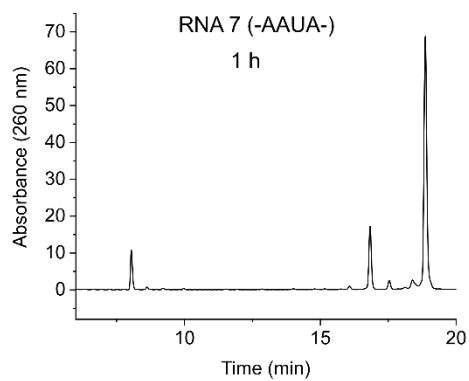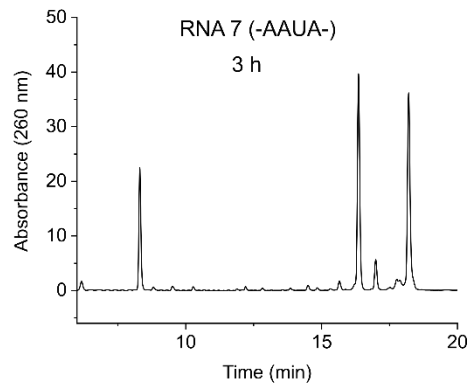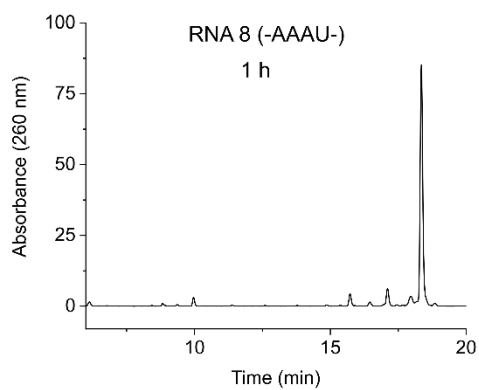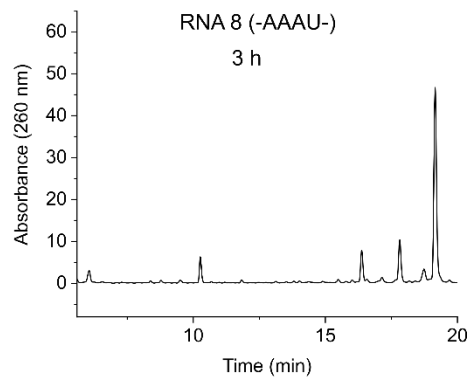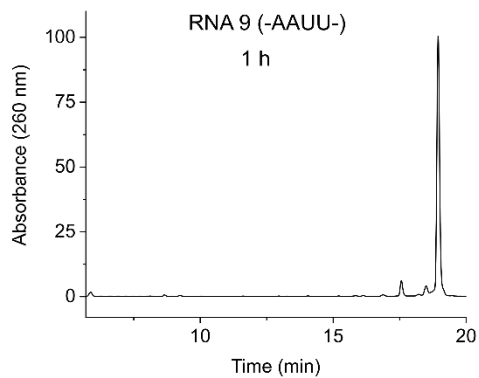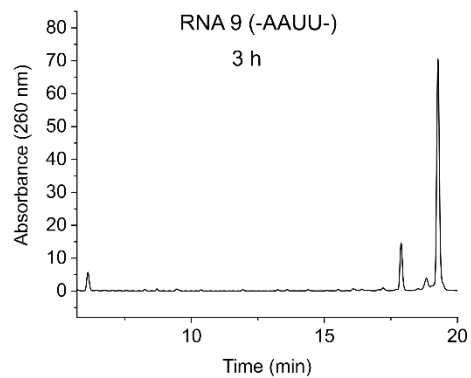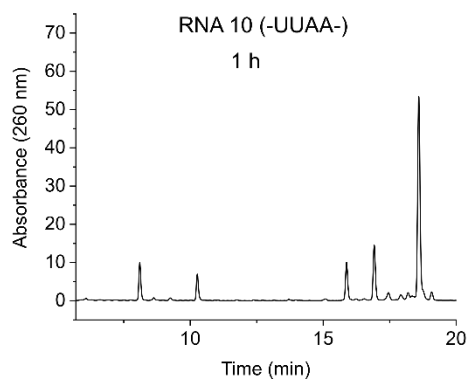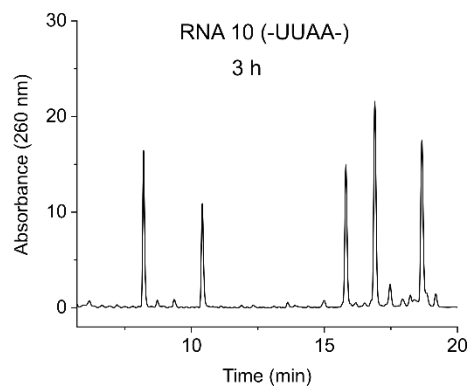

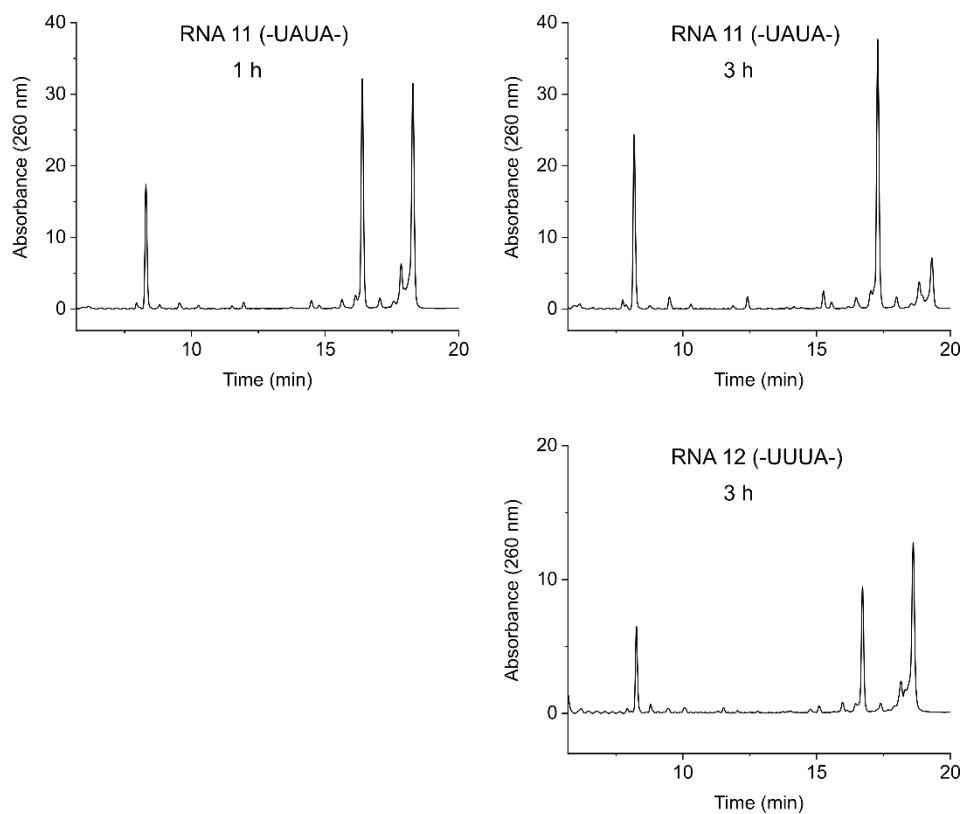

### S-3.16. MS analysis of RNA fragments from the cleavage of RNAs 4 and 11 by *PNazyme I*

RNA 4 cleavage fragment 1 (5'-AGCCC-3')  $C_{47}H_{61}N_{19}O_{32}P_4$

Monoisotopic mass calc. 1527.268, obs. 1527.292.

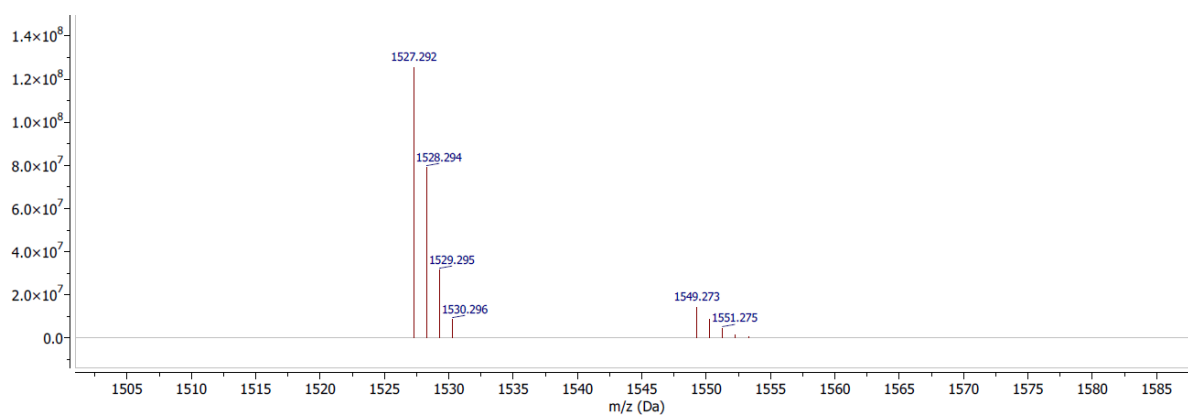

RNA 4 cleavage fragment 2 (5'-AA-GCCC-3')  $C_{57}H_{73}N_{24}O_{38}P_5$

Monoisotopic mass calc. 1856.321, obs. 1856.351.

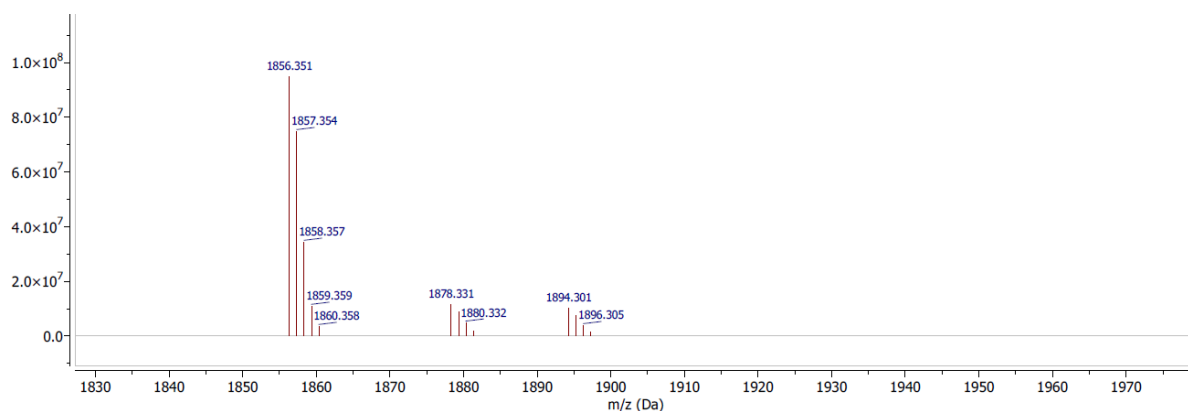

RNA 4 cleavage fragment 3 (2',3'-cyclic phosphate, 5'-AGAGUUC-AA-3')  $C_{87}H_{106}N_{37}O_{61}P_9$

Monoisotopic mass calc. 2923.397, obs. 2923.445.

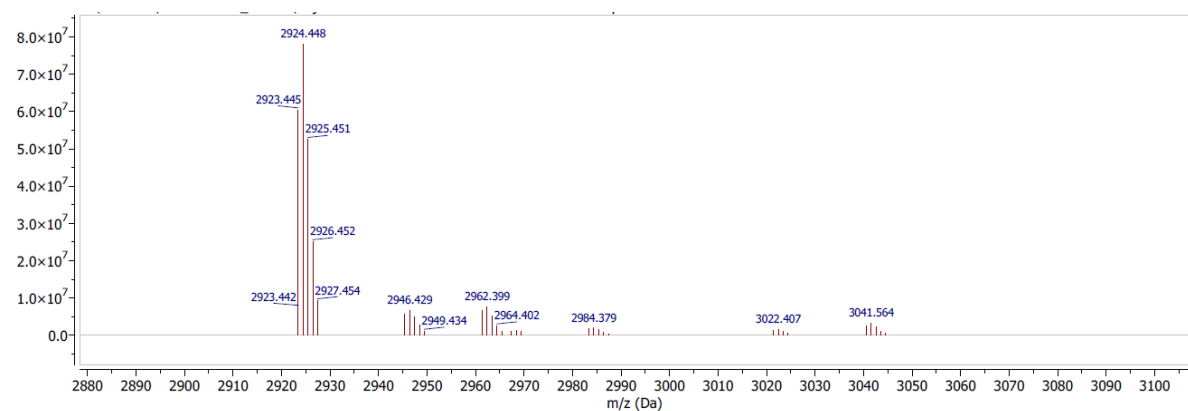

RNA 4 cleavage fragment 4 (2',3'-cyclic phosphate, 5'-AGAGUUC-AAA-3')  $C_{97}H_{118}N_{42}O_{67}P_{10}$

Monoisotopic mass calc. 3252.449, obs. 3252.501

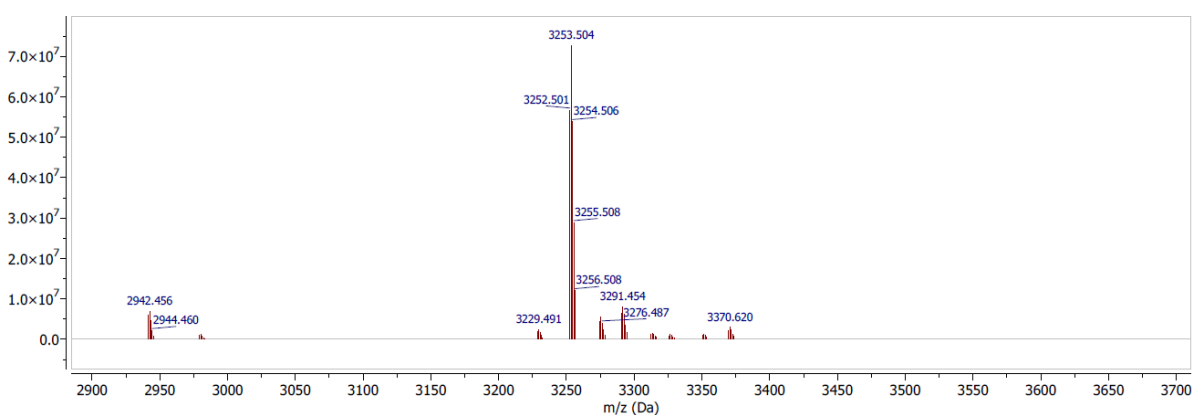

RNA 11 cleavage fragment 1 (5'-AGCCC-3')  $C_{47}H_{61}N_{19}O_{32}P_4$

Monoisotopic mass calc. 1527.268, obs. 1526.285

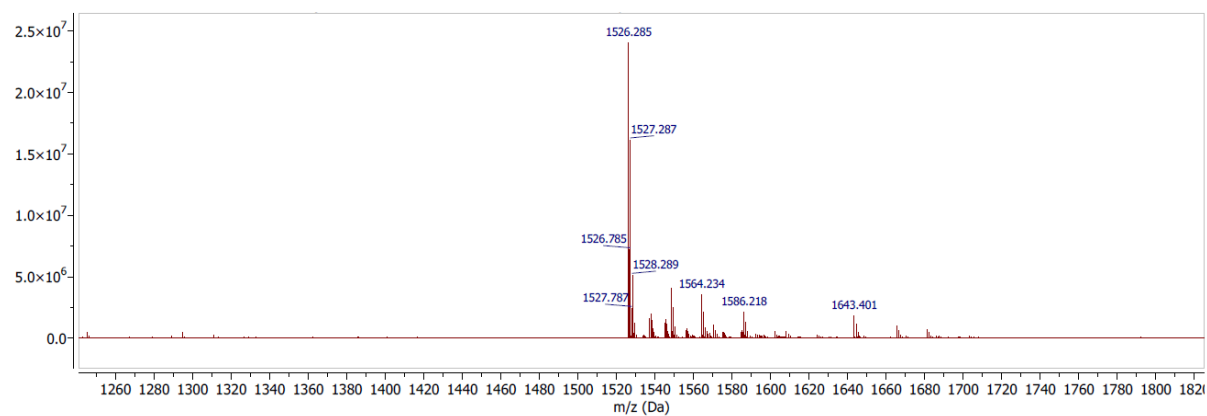

RNA 11 cleavage fragment 2 (2',3'-cyclic phosphate, 5'-AGAGUUC-UAU-3')  $C_{95}H_{116}N_{36}O_{71}P_{10}$

Monoisotopic mass calc. 3206.395, obs. 3206.447

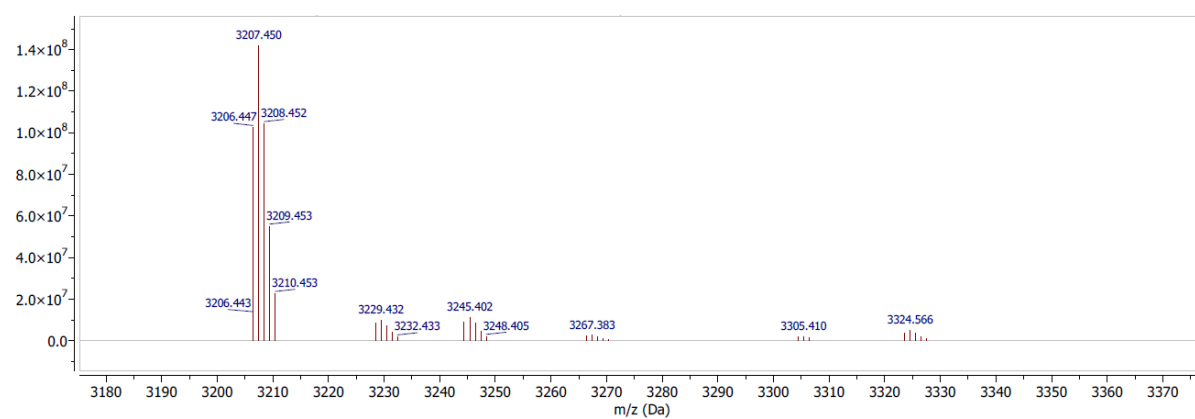

## S-4. Circular Dichroism Spectroscopy of RNA/PNAzyme complexes

### S-4.1. Complexes where the bulge-closing base pair varies in the long recognition arm

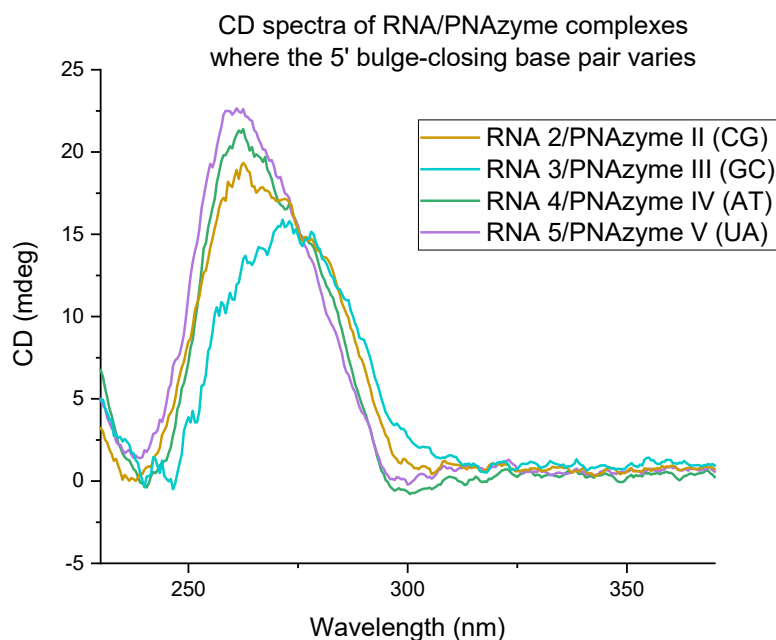

### S-4.2 Complexes with a GT wobble vs a GC Watson-Crick base pair closing the bulge in the short recognition arm

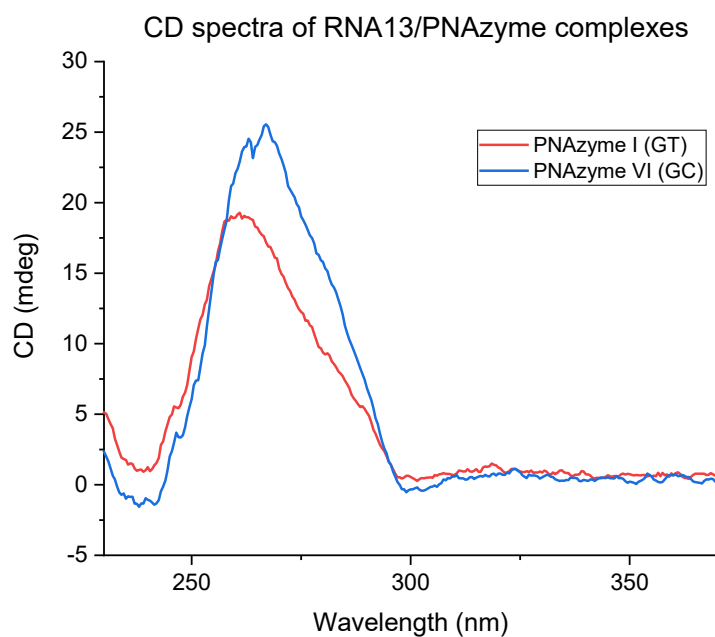

## S-5. RNA cleavage experiments in the presence of $\text{Mg}^{2+}$ and $\text{K}^+$

Extent of cleavage of RNA 13 (AUA bulge) by PNAzyme I at pH 7.0

- (a) 100  $\mu\text{M}$   $\text{Zn}(\text{NO}_3)_2$ , 10 mM HEPES, 0.1 M  $\text{NaCl}$     (b) 100  $\mu\text{M}$   $\text{Zn}(\text{NO}_3)_2$ , 10 mM HEPES, 0.1 M  $\text{NaCl}$   
100  $\mu\text{M}$   $\text{MgCl}_2$ , 100  $\mu\text{M}$   $\text{KCl}$

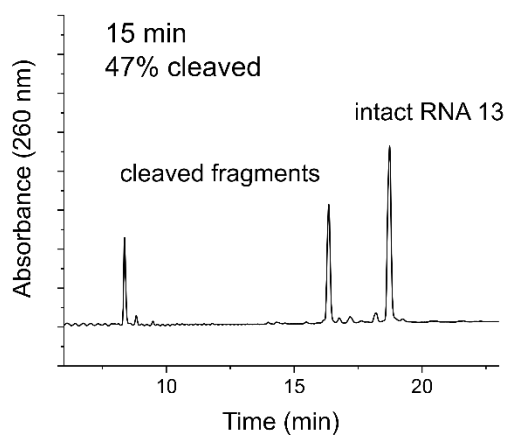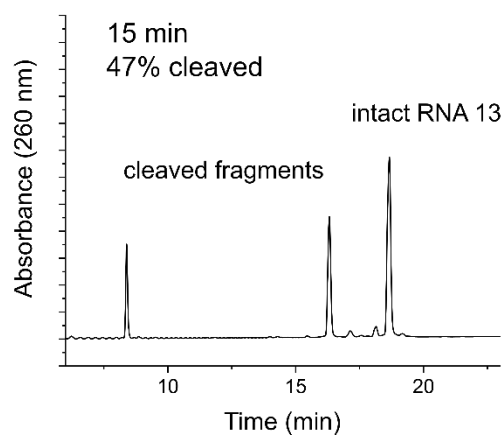

\* (a) has been previously reported by Luige et al<sup>1</sup>

## References

- 1 O. Luige, P. P. Bose, R. Stulz, P. Steunenberg, O. Brun, S. Andersson, M. Murtola and R. Strömberg, *Chem. Commun.*, 2021, **57**, 10911–10914.
